# Supplementary material for: Catalyst-free cross-coupling of N-tosylhydrazones with chromium(0) Fischer carbene complexes: a new approach to diarylethanone
Source: Royal Society of Chemistry journal article supplement (doi:10.1039/c5qo00241a), 2015-01-01

*Supporting Information for*

**Catalyst-Free Cross-Coupling of *N*-Tosylhydrazones with  
Chromium(0) Fischer Carbene Complexes: A New Approach to  
Diarylethanone**

Fangdong Hu,<sup>a,b</sup> Jinghui Yang,<sup>a</sup> Ying Xia,<sup>a</sup> Chen Ma,<sup>b</sup> Haiping Xia,<sup>c</sup> Yan Zhang,<sup>a</sup>  
Jianbo Wang<sup>\*,a</sup>

<sup>a</sup>*Beijing National Laboratory of Molecular Sciences (BNLMS) and Key Laboratory of  
Bioorganic Chemistry and Molecular Engineering of Ministry of Education, College  
of Chemistry, Peking University Beijing 100871, China*

<sup>b</sup>*School of Chemistry and Chemical Engineering, Shandong University, Jinan 250100,  
China*

<sup>c</sup>*College of Chemistry and Chemical Engineering, Xiamen University, Xiamen,  
361005, China*

Email: wangjb@pku.edu.cn

**<sup>1</sup>H and <sup>13</sup>C NMR spectra of substrates and products**

*Pentacarbonyl[(methoxy)(phenyl)carbene]chromium(0) (2a)*

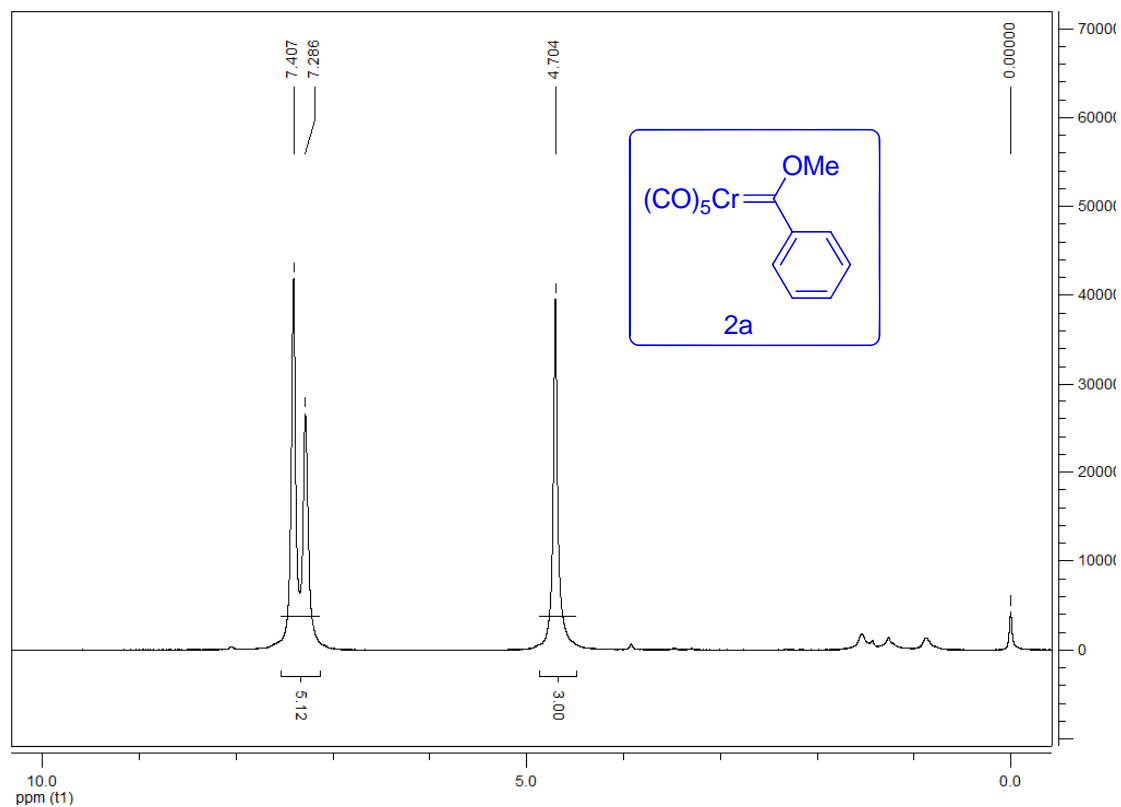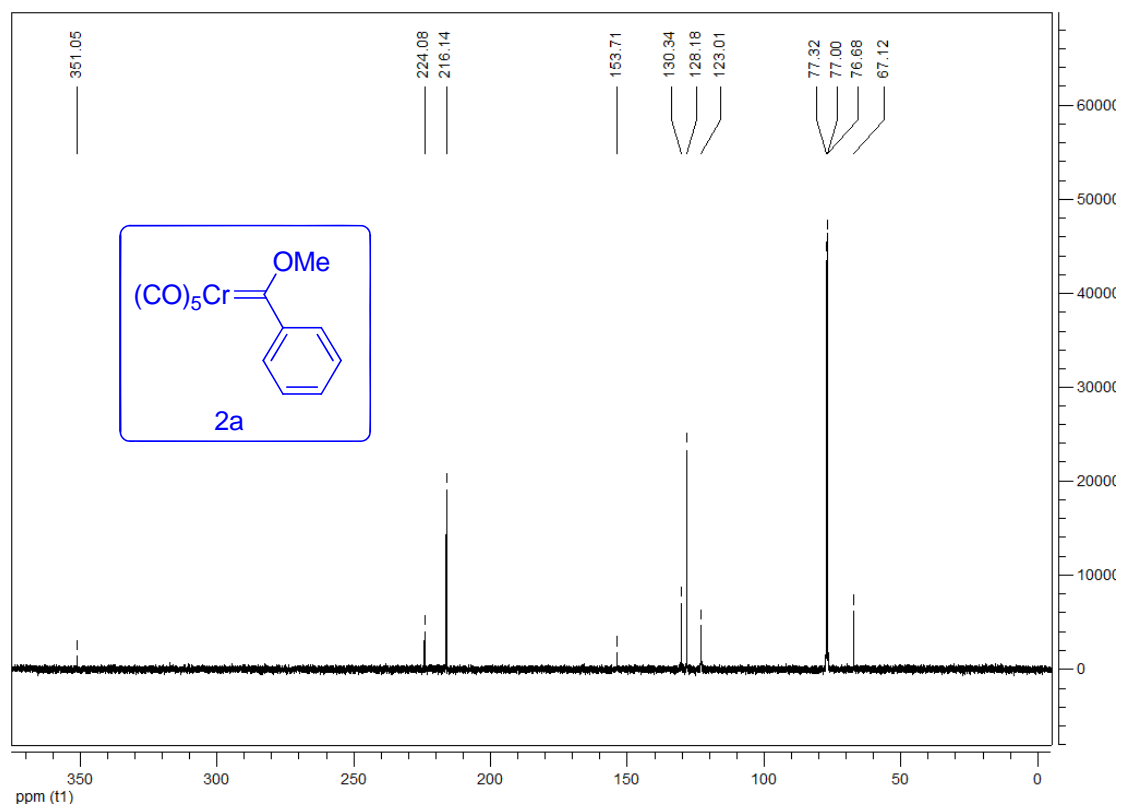

*Pentacarbonyl[(2-methylphenyl)(methoxy)carbene]chromium(0) (2b)*

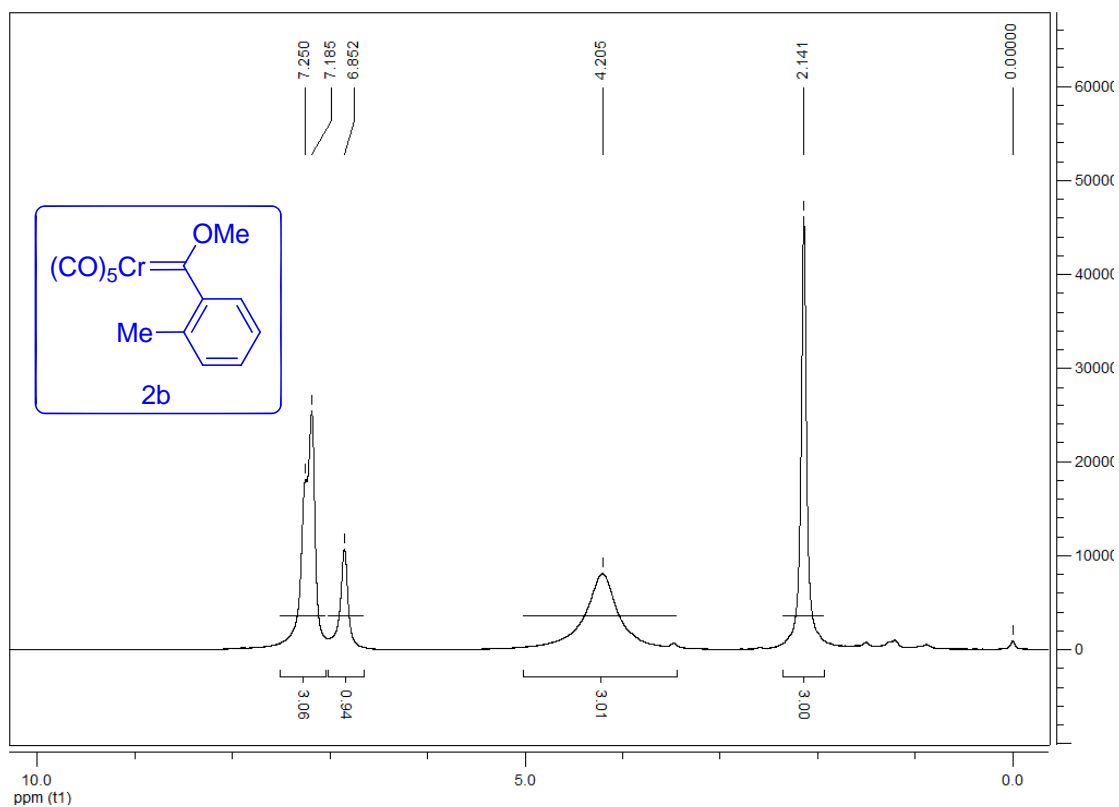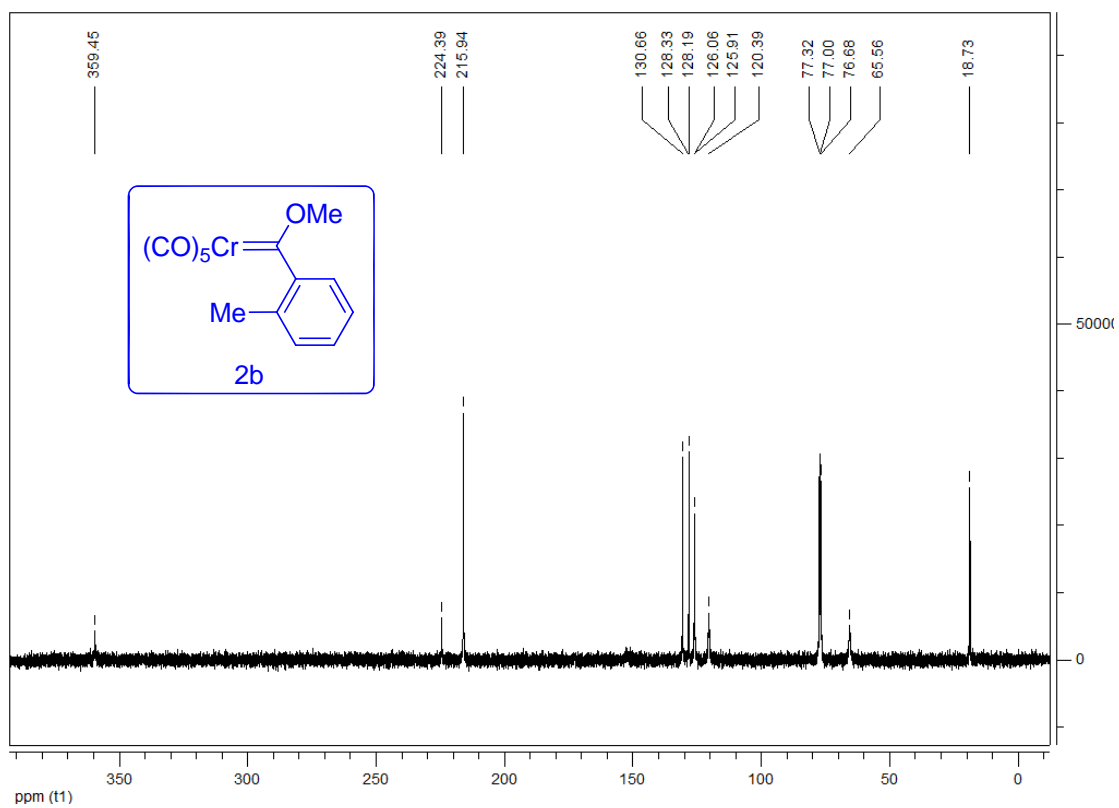

*Pentacarbonyl[(3-chlorophenyl)(methoxy)carbene]chromium(0) (2c)*

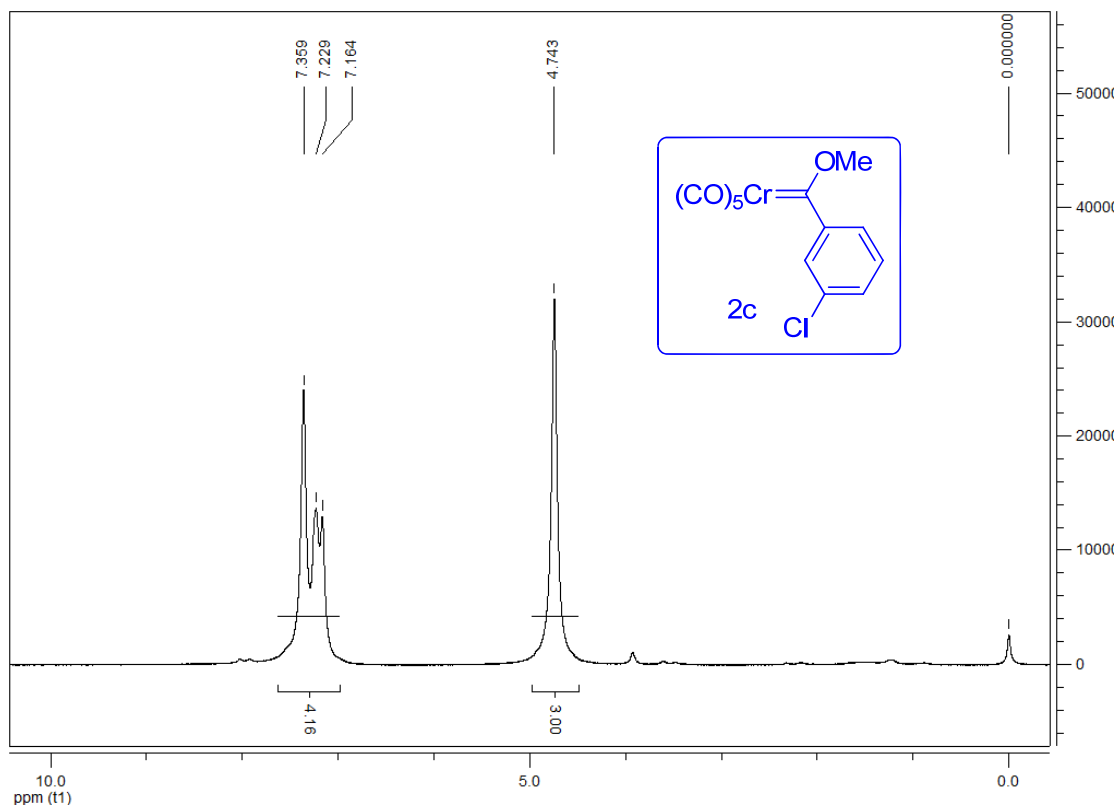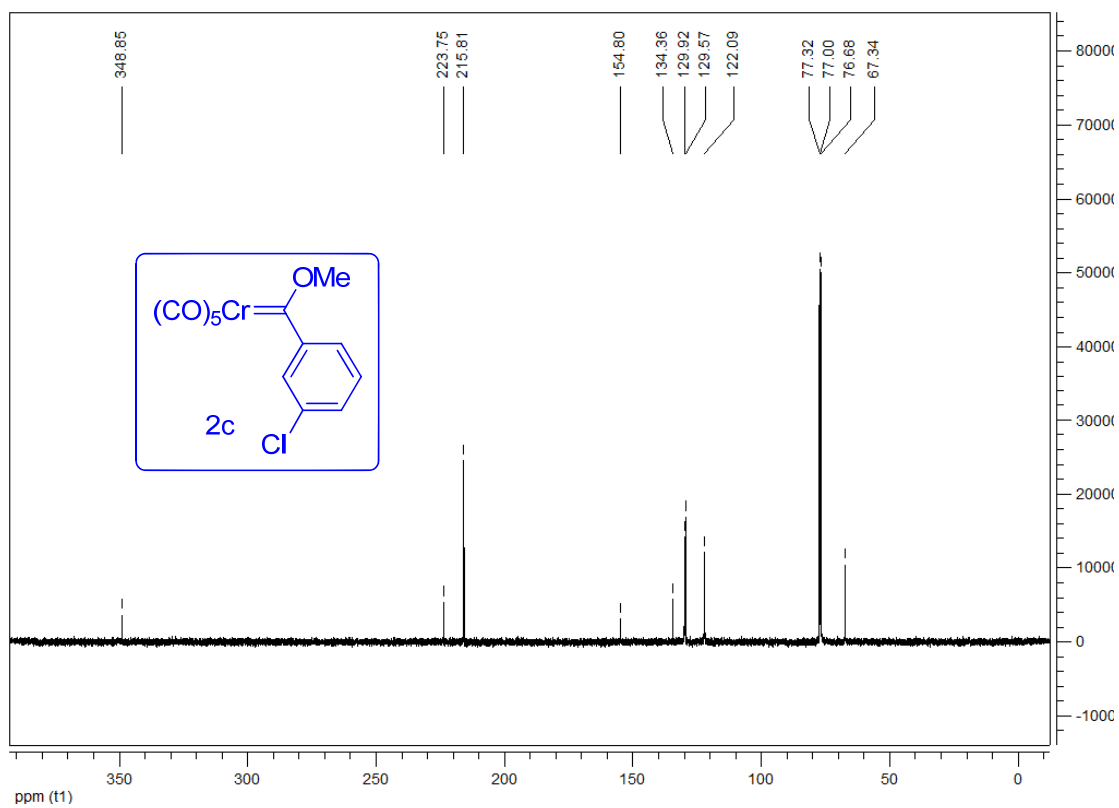

***Pentacarbonyl[(methoxy)(3-methoxyphenyl)carbene]chromium(0) (2d)***

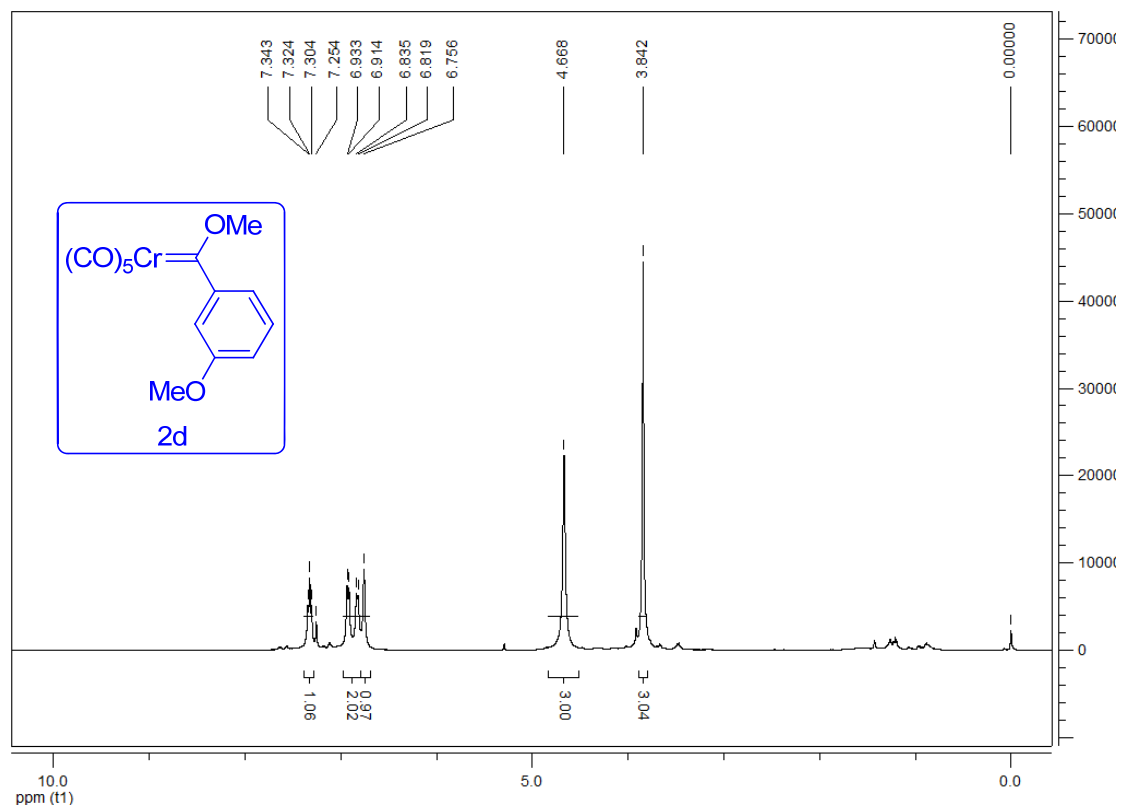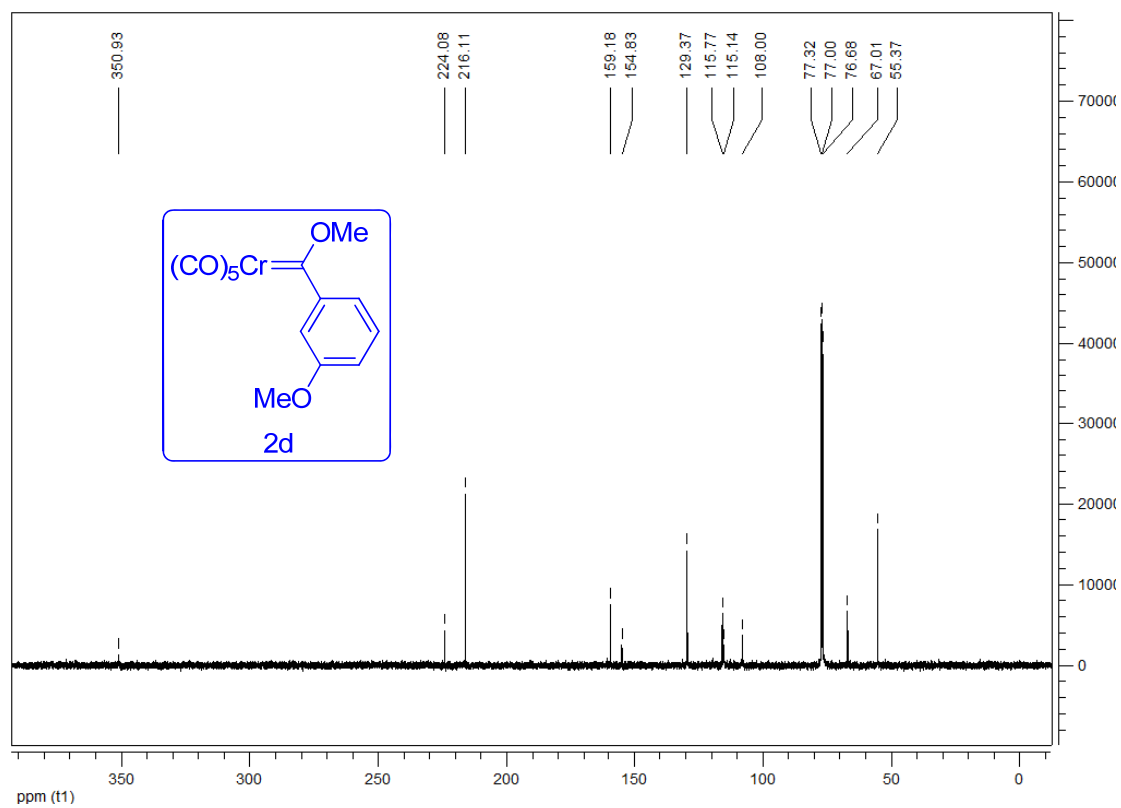

*Pentacarbonyl[(methoxy)(4-methylphenyl)carbene]chromium(0) (2e)*

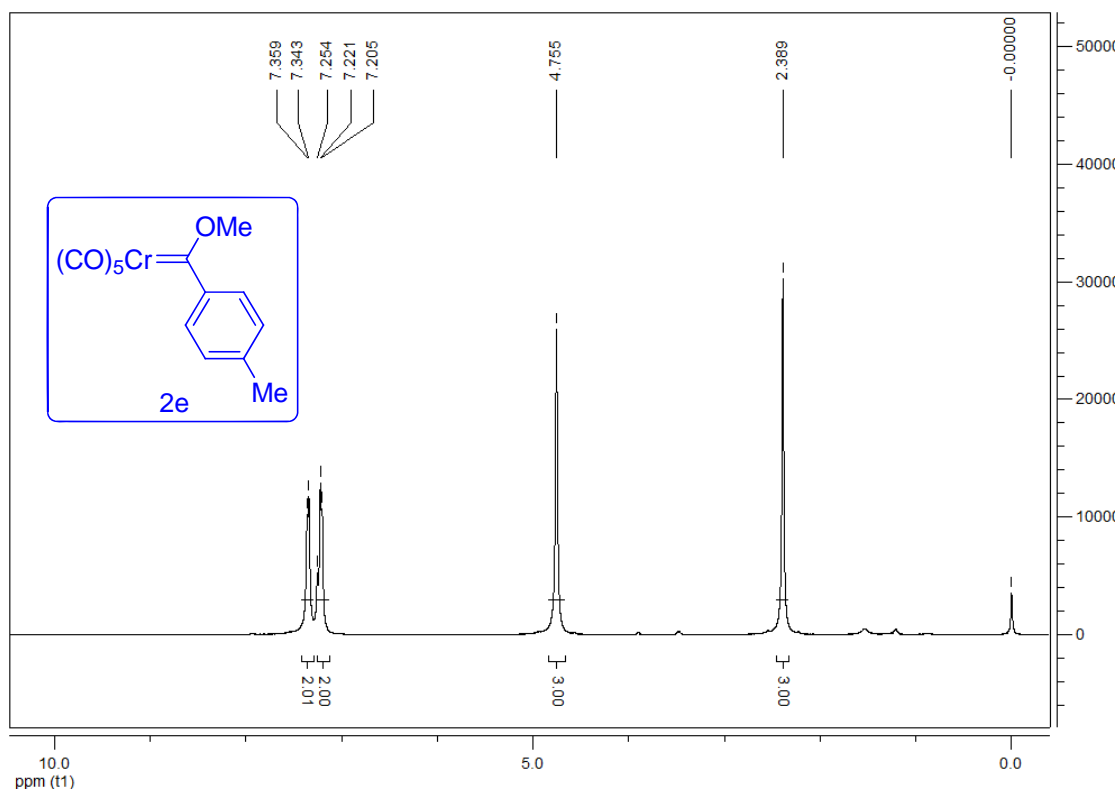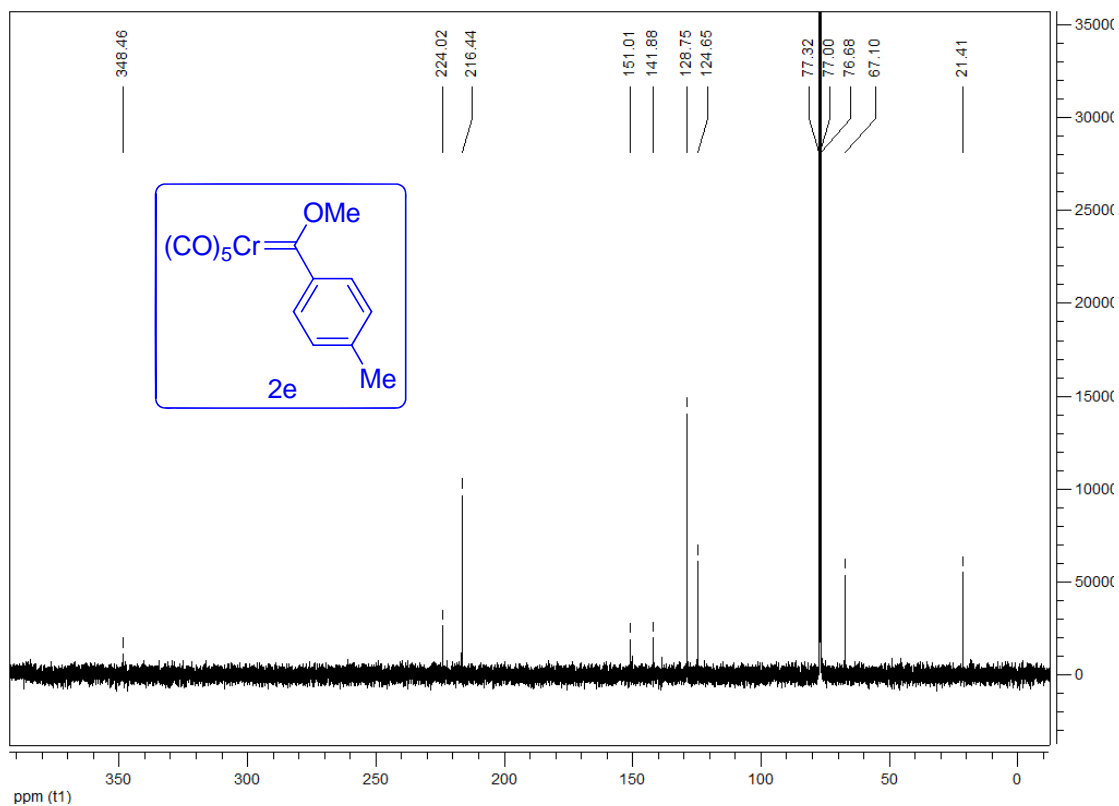

*Pentacarbonyl[(4-biphenyl)(methoxy)carbene]chromium(0) (2f)*

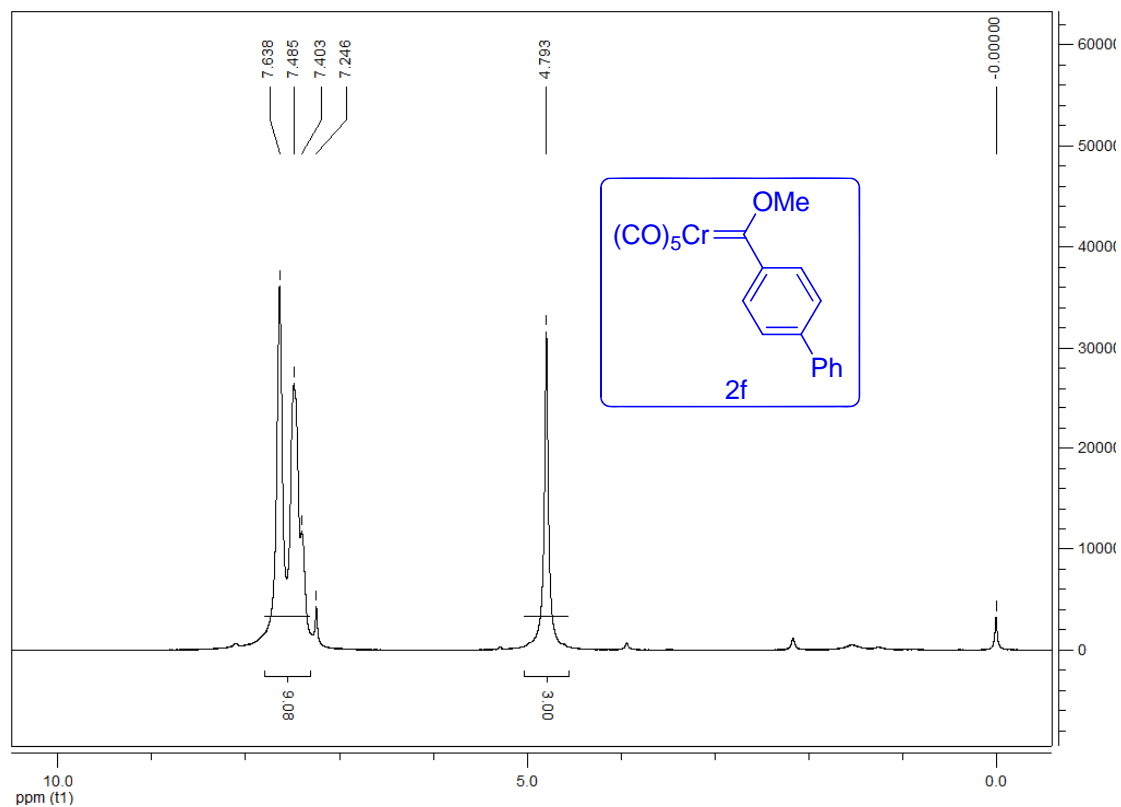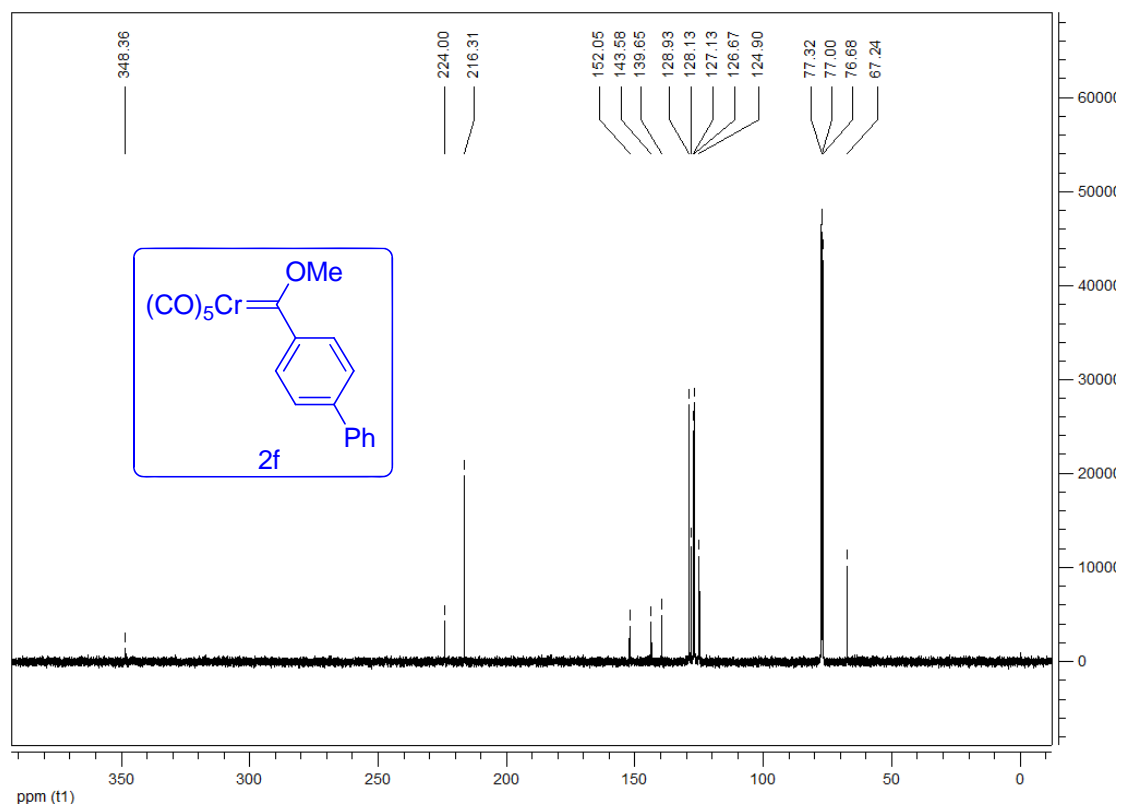

*Pentacarbonyl[(methoxy)(4-methoxyphenyl)carbene]chromium(0) (2g)*

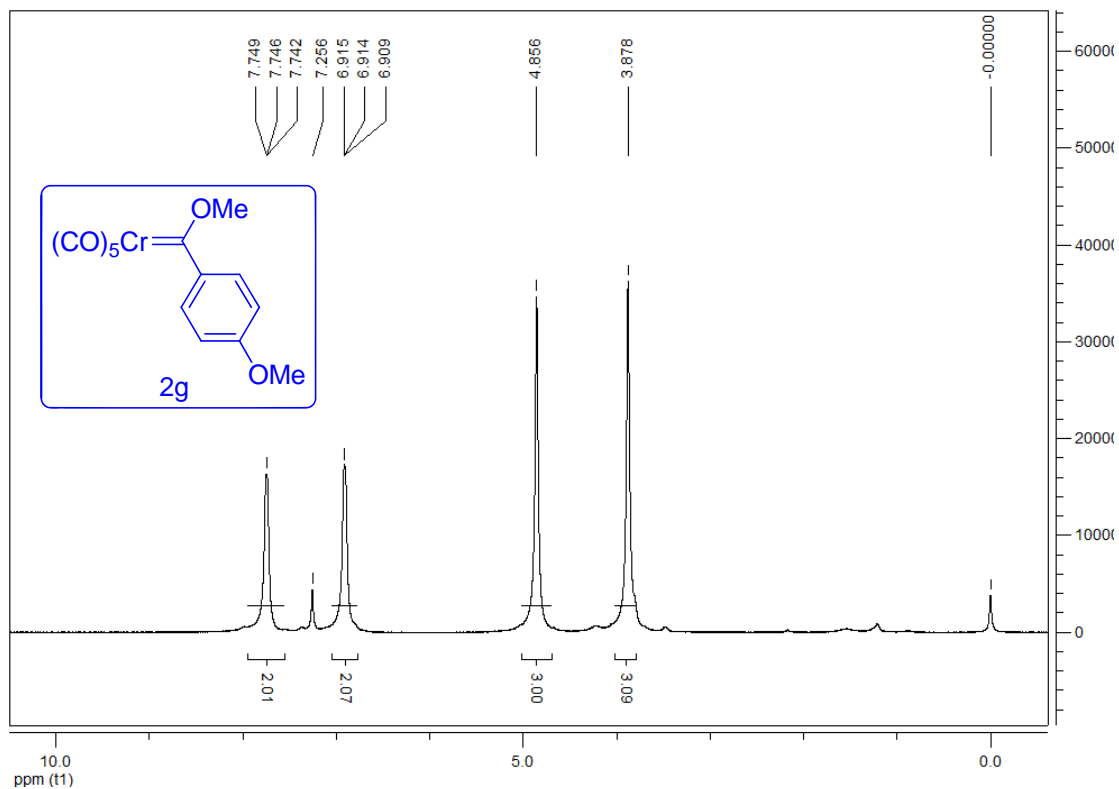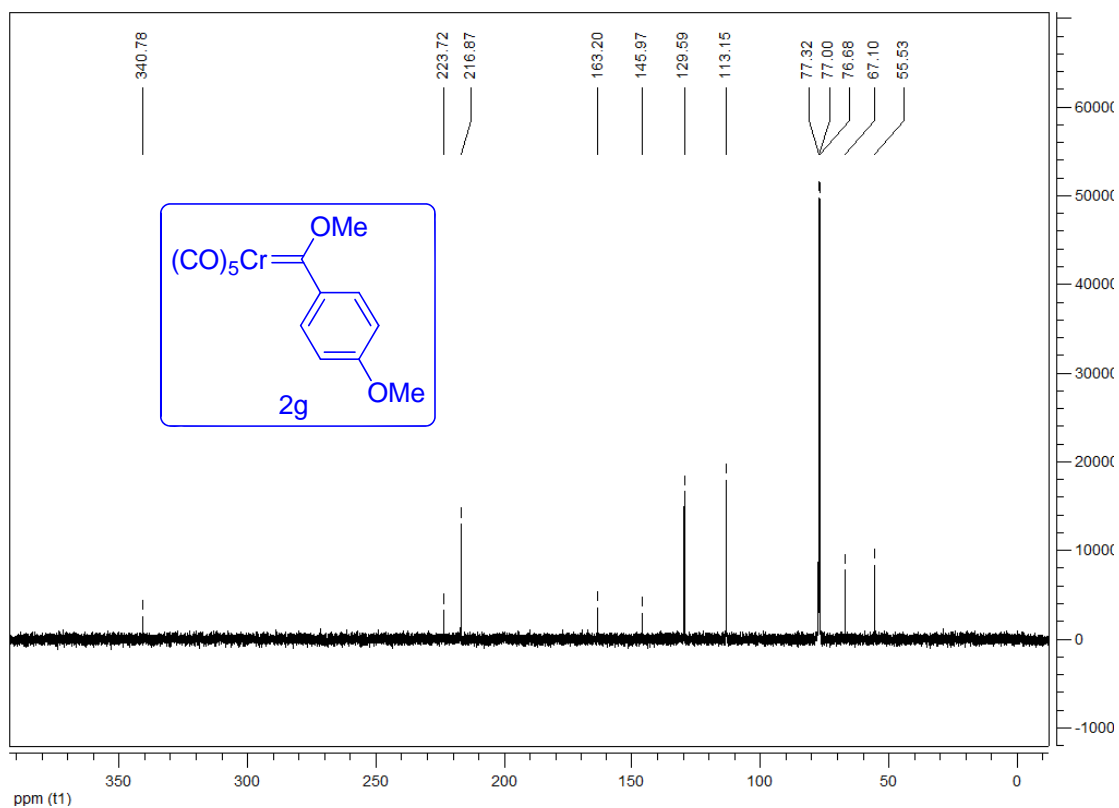



*Pentacarbonyl[(4-fluorophenyl)(methoxy)carbene]chromium(0) (2h)*

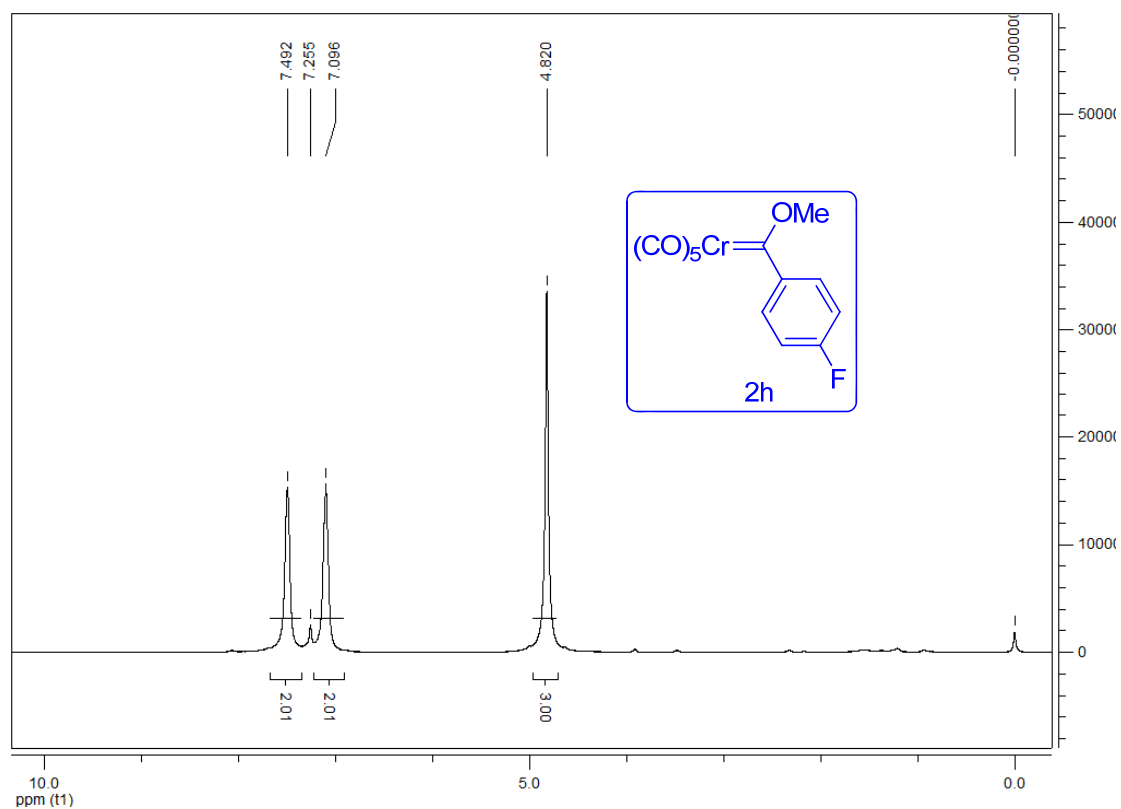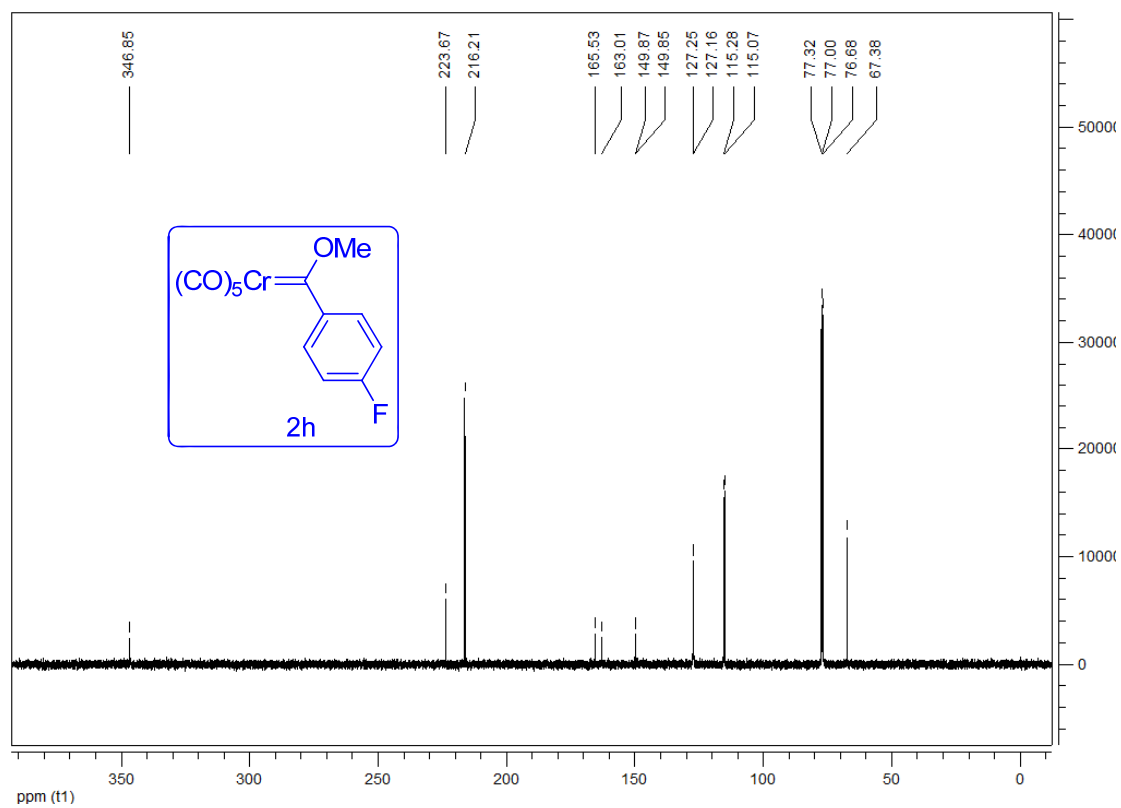

***Pentacarbonyl[(4-chlorophenyl)(methoxy)carbene]chromium(0) (2i)***

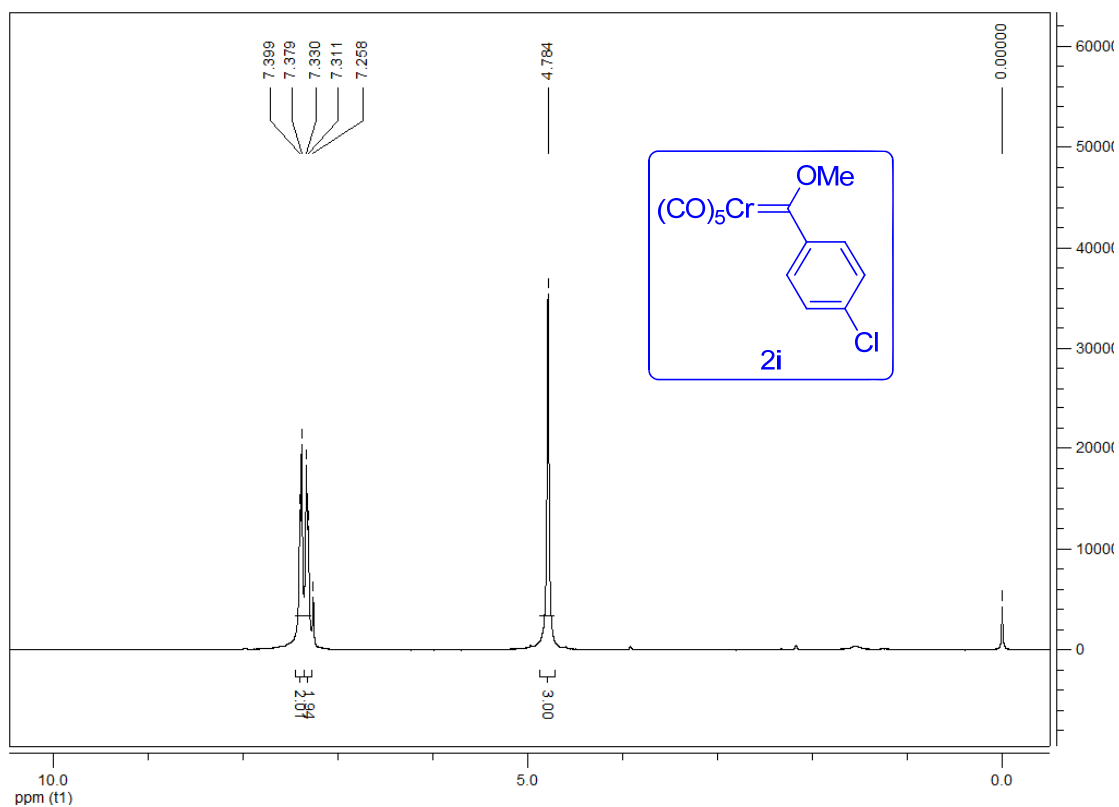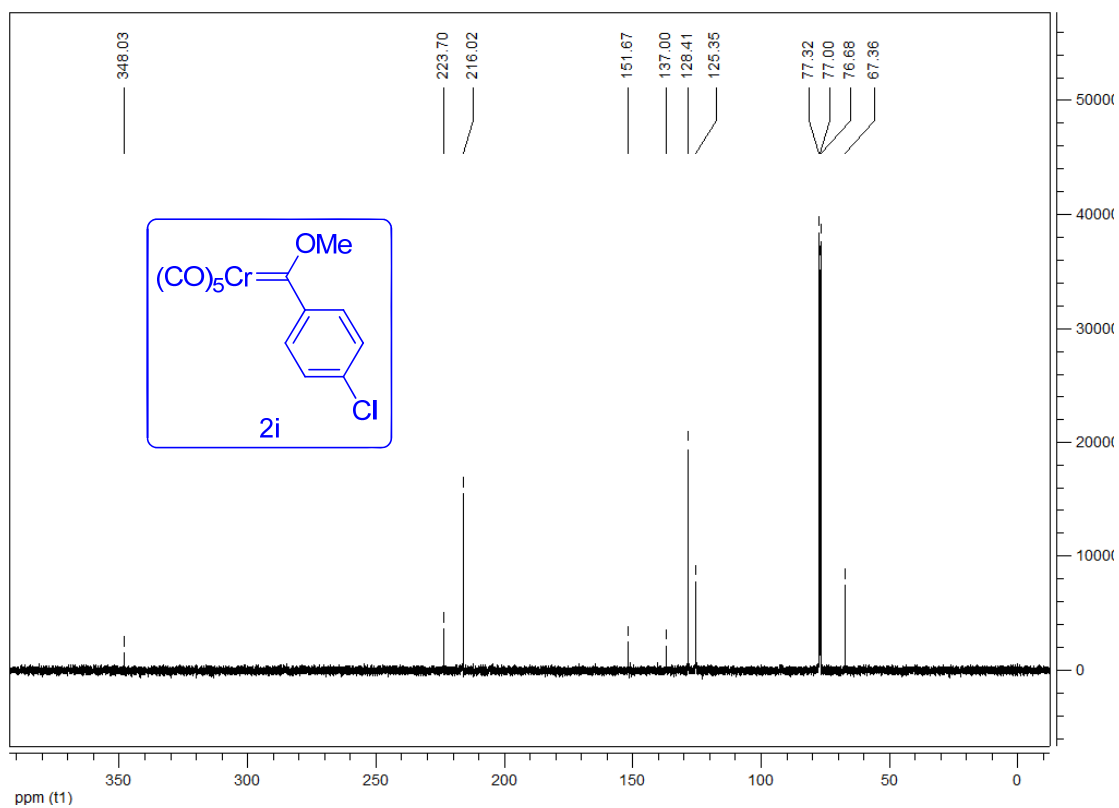

*Pentacarbonyl[methoxy(2-naphthalenyl)carbene]chromium(0) (2j)*

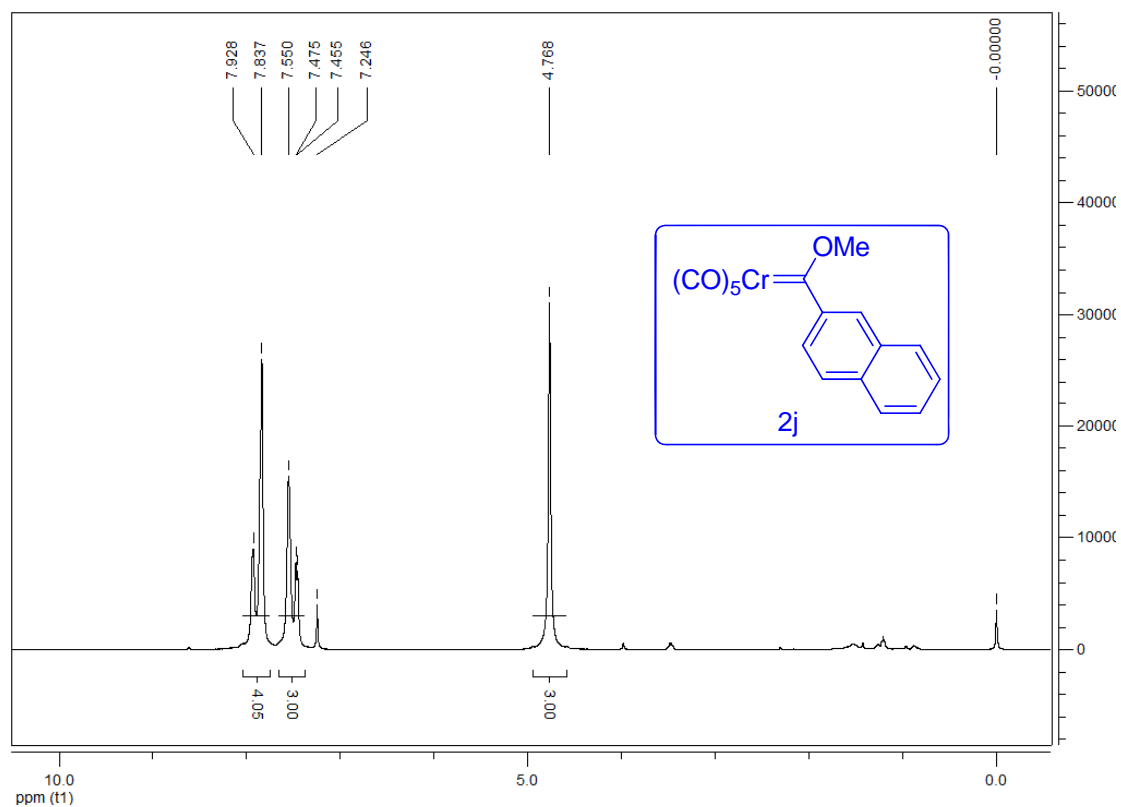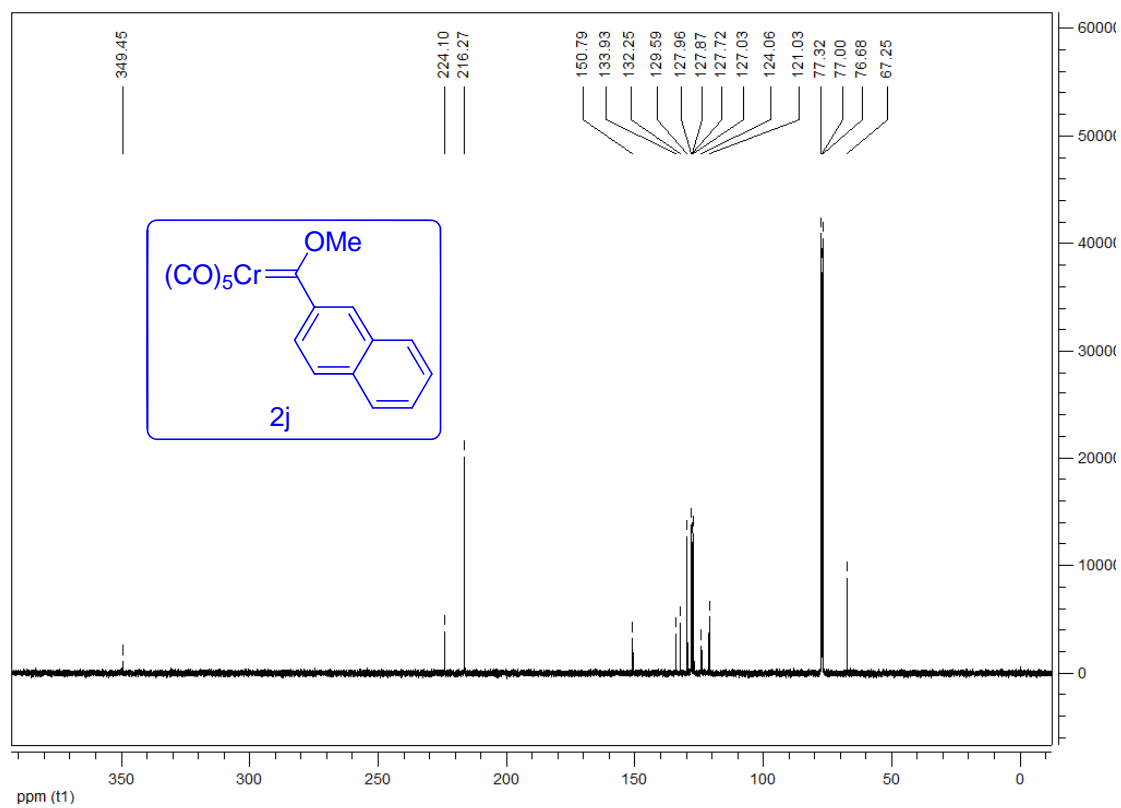

*Pentacarbonyl[(2-thiofuryl)(methoxy)carbene]chromium(0) (2k)*

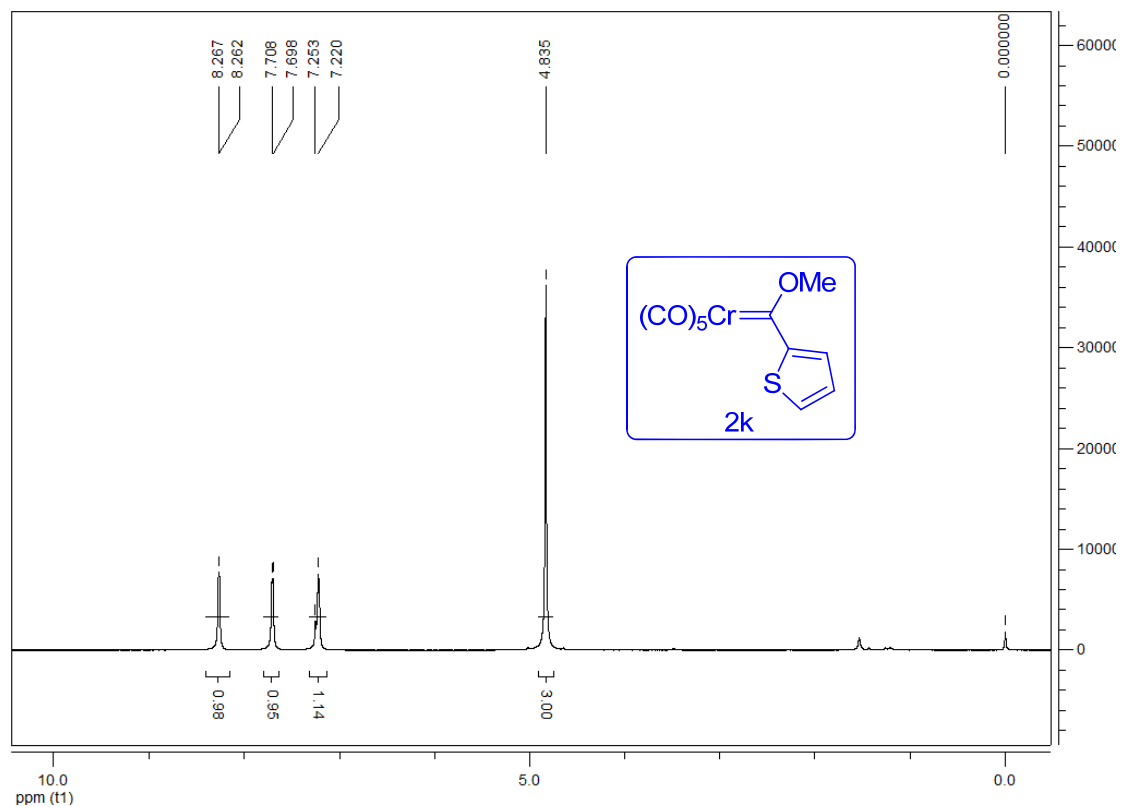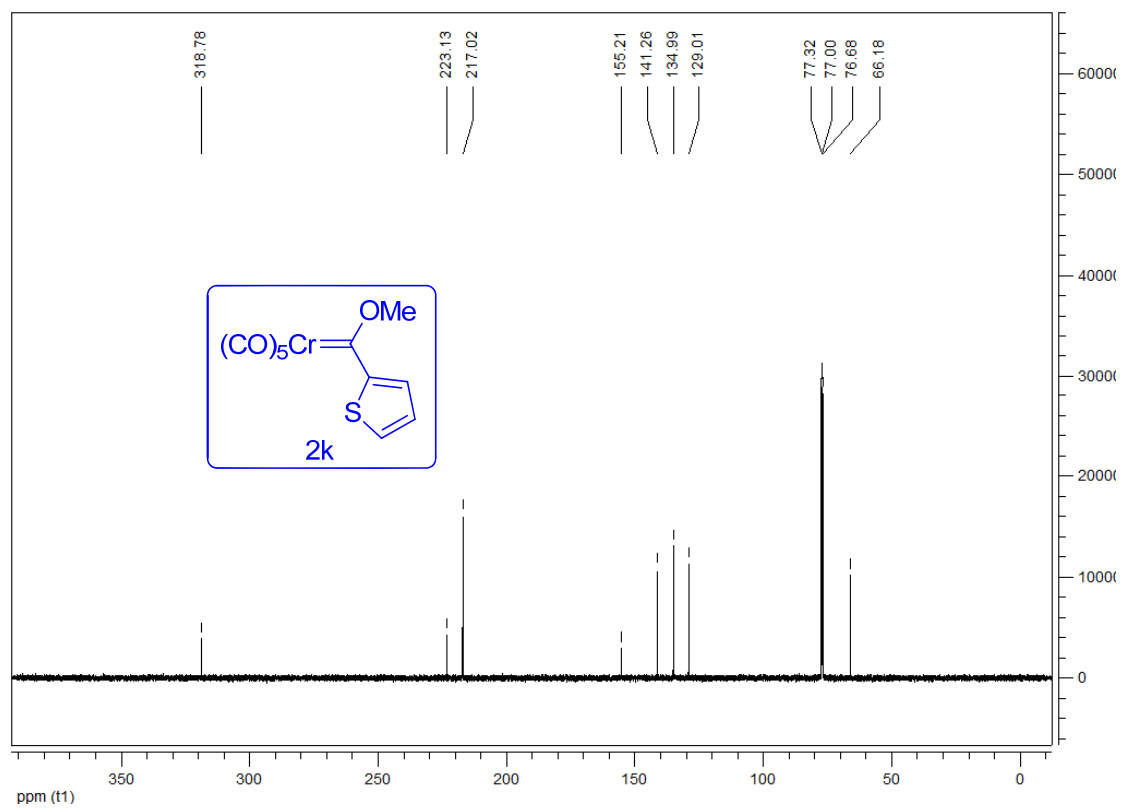

### 1,2-Diphenylethanone (3a)

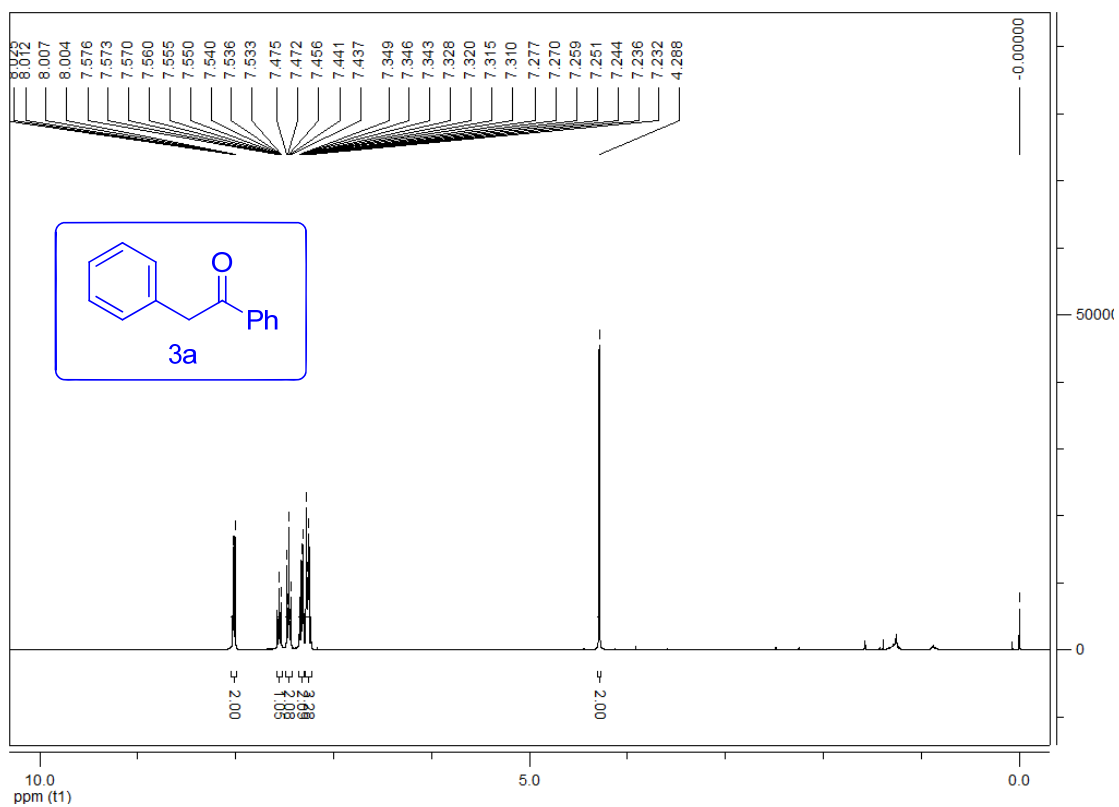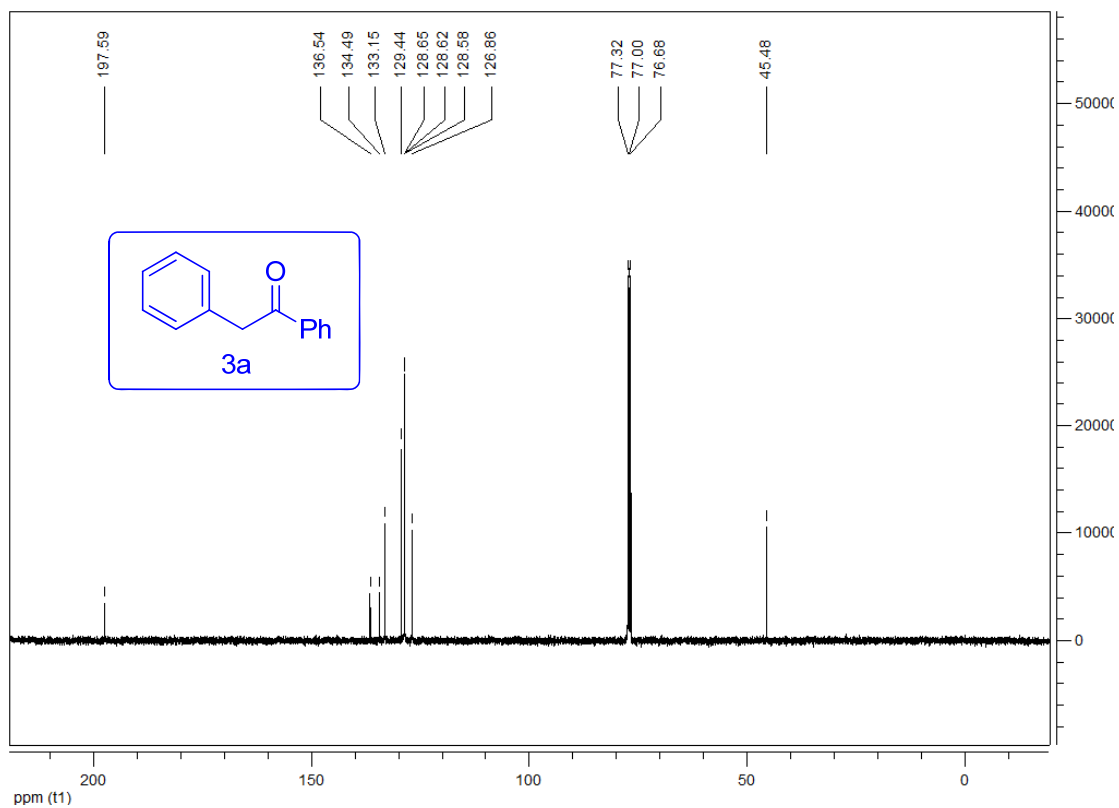

**1-Phenyl-2-(p-tolyl)ethanone (3b)**

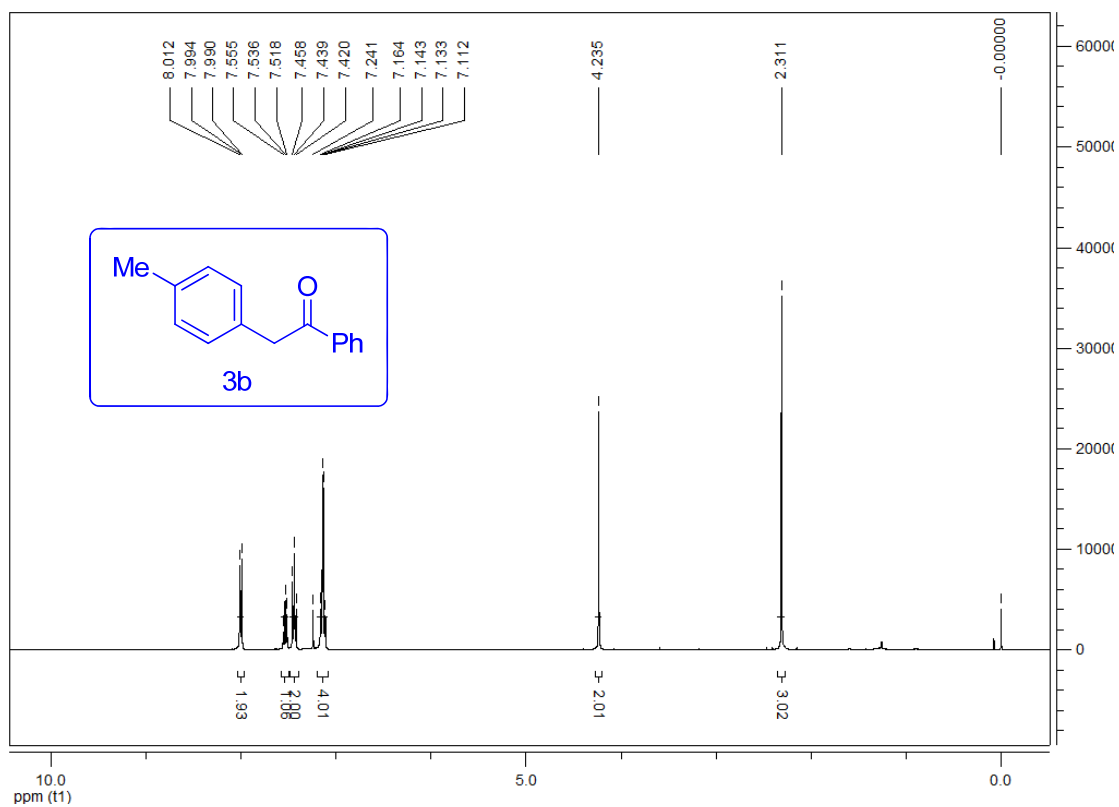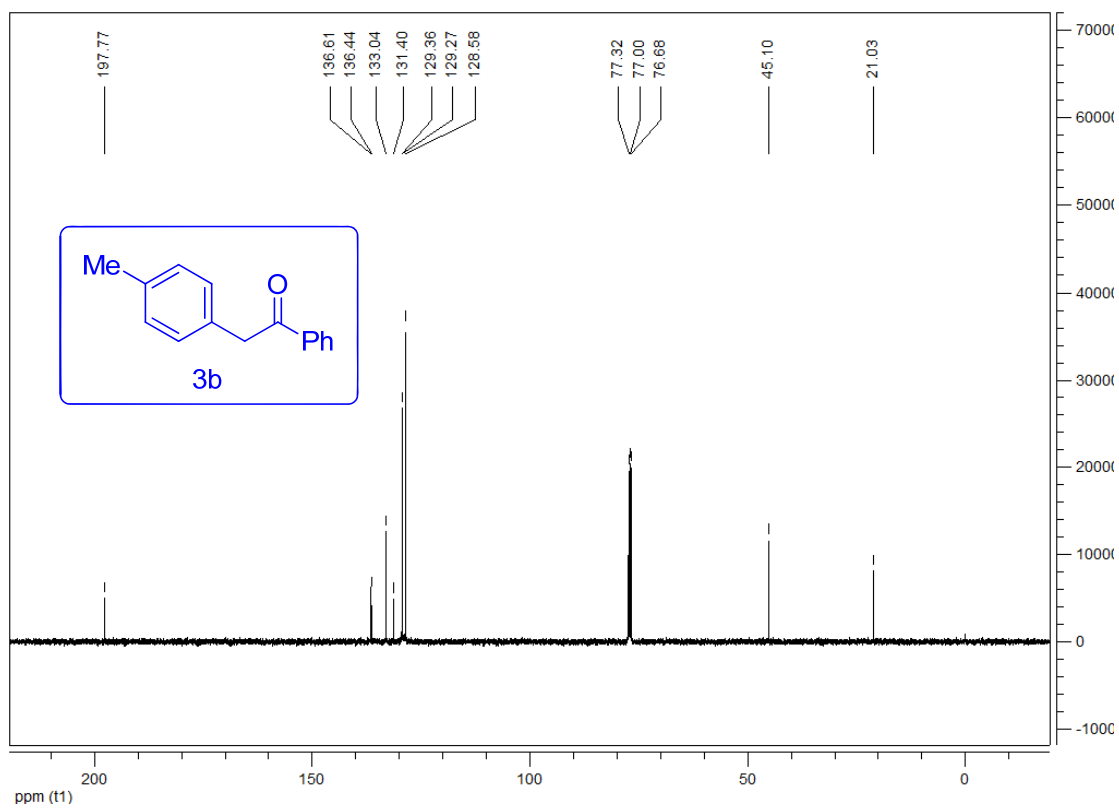

*2-(4-(tert-Butyl)phenyl)-1-phenylethanone (3c)*

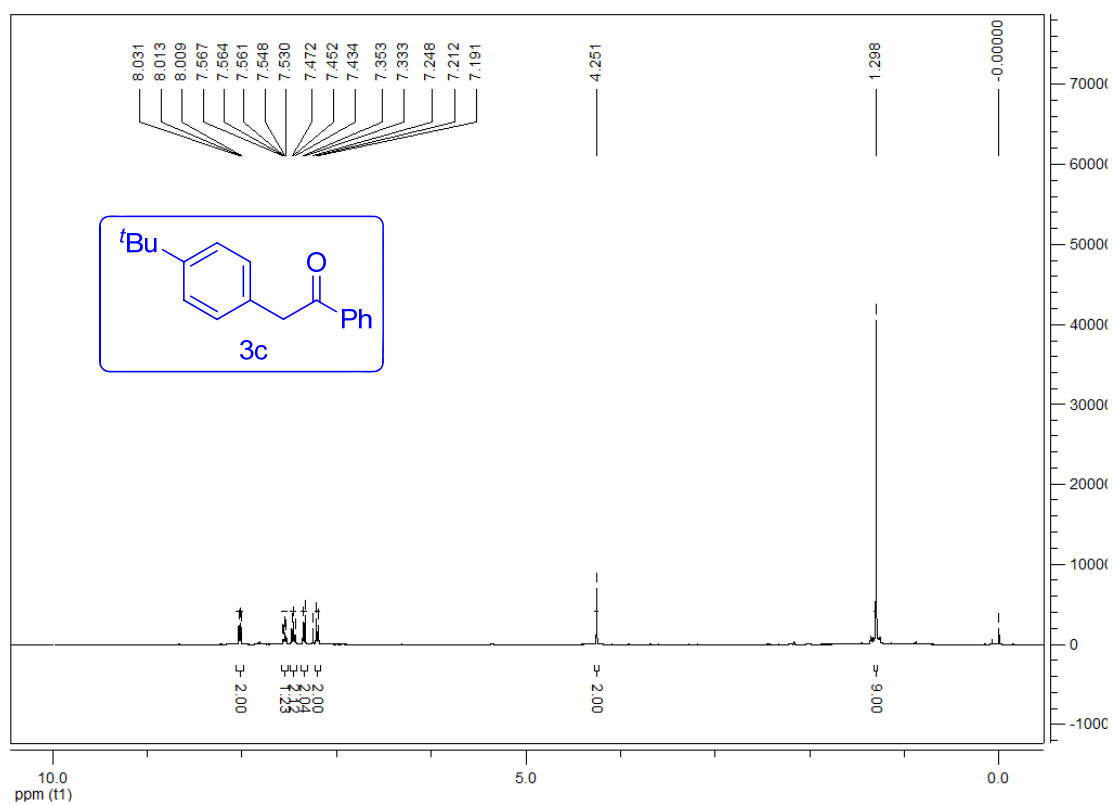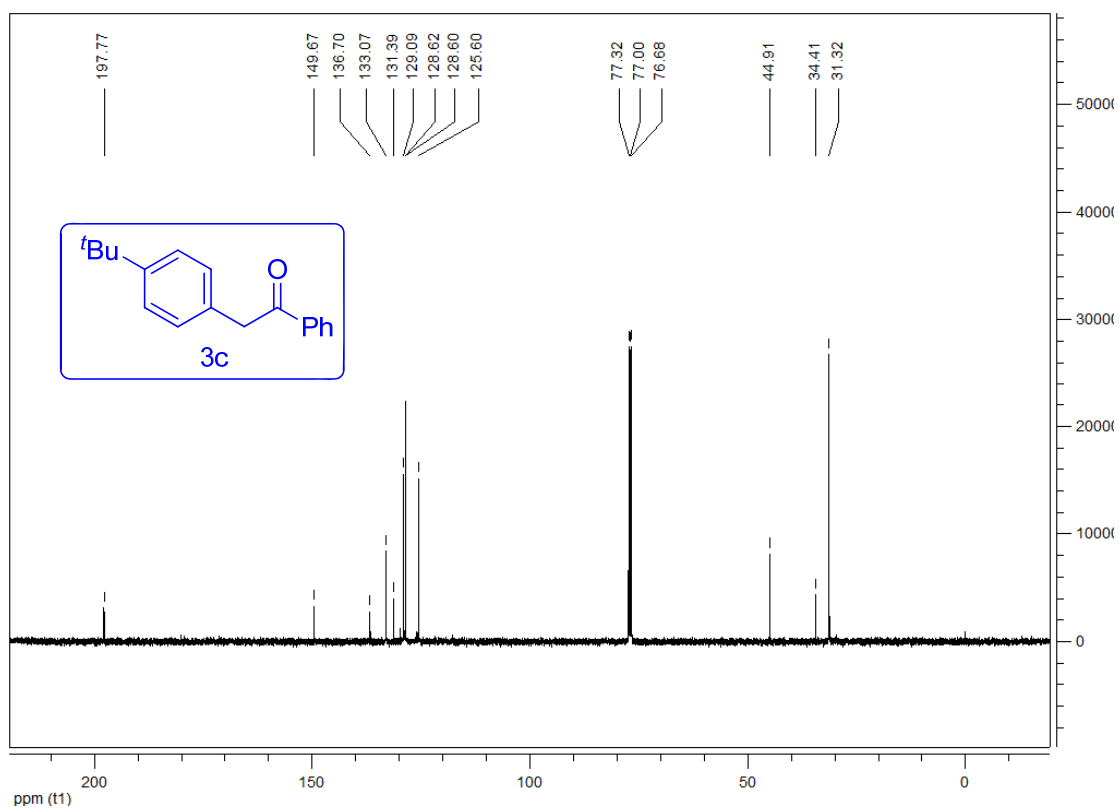

**2-([1,1'-Biphenyl]-4-yl)-1-phenylethanone (3d)**

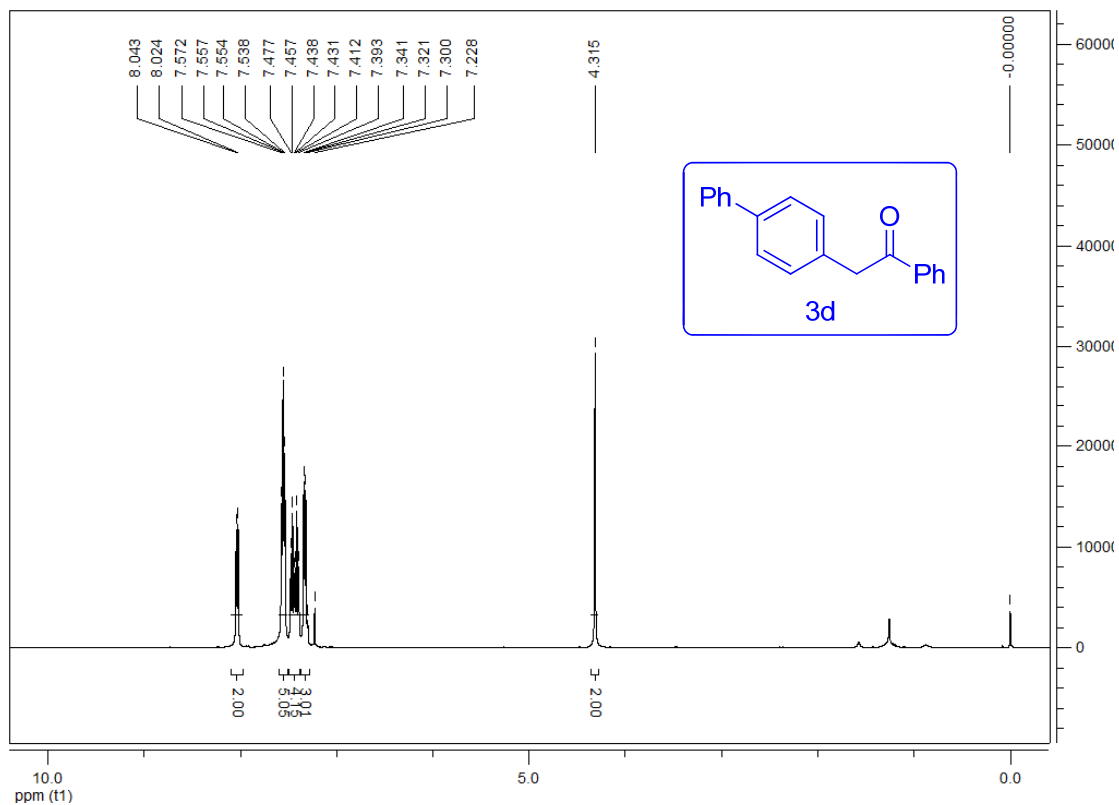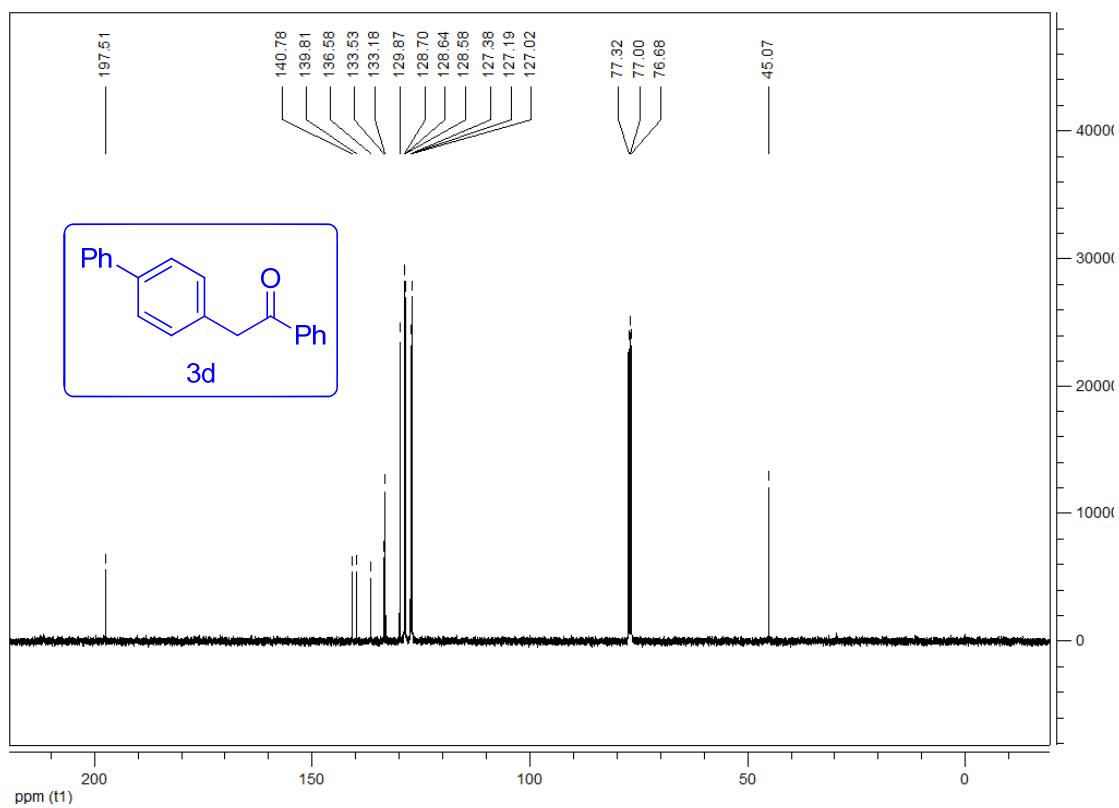



**2-(4-Bromophenyl)-1-phenylethanone (3e)**

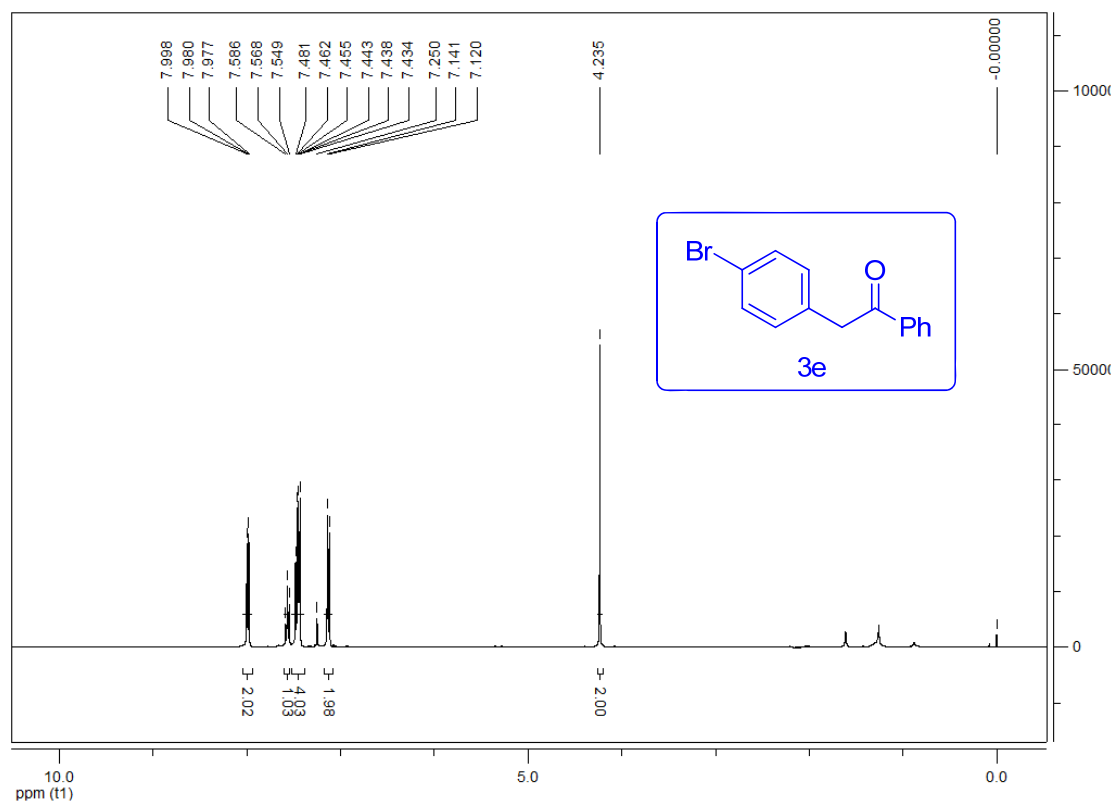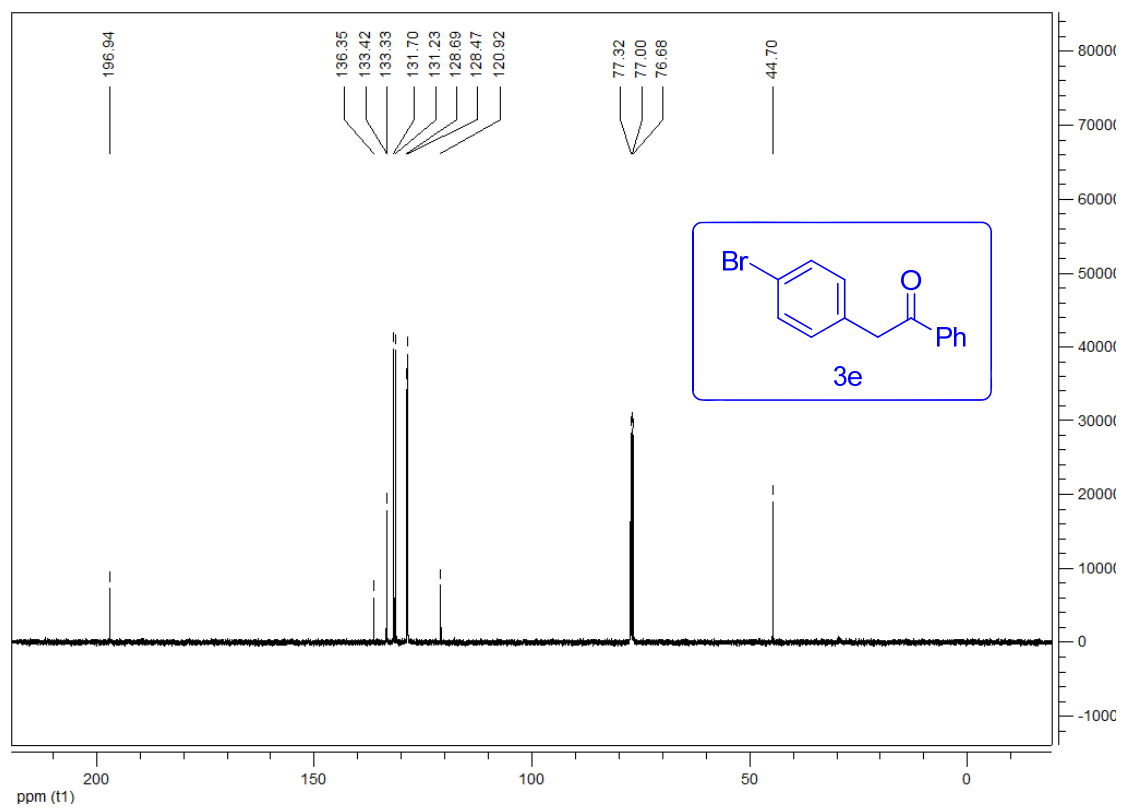

**2-(4-Methoxyphenyl)-1-phenylethanone (3f)**

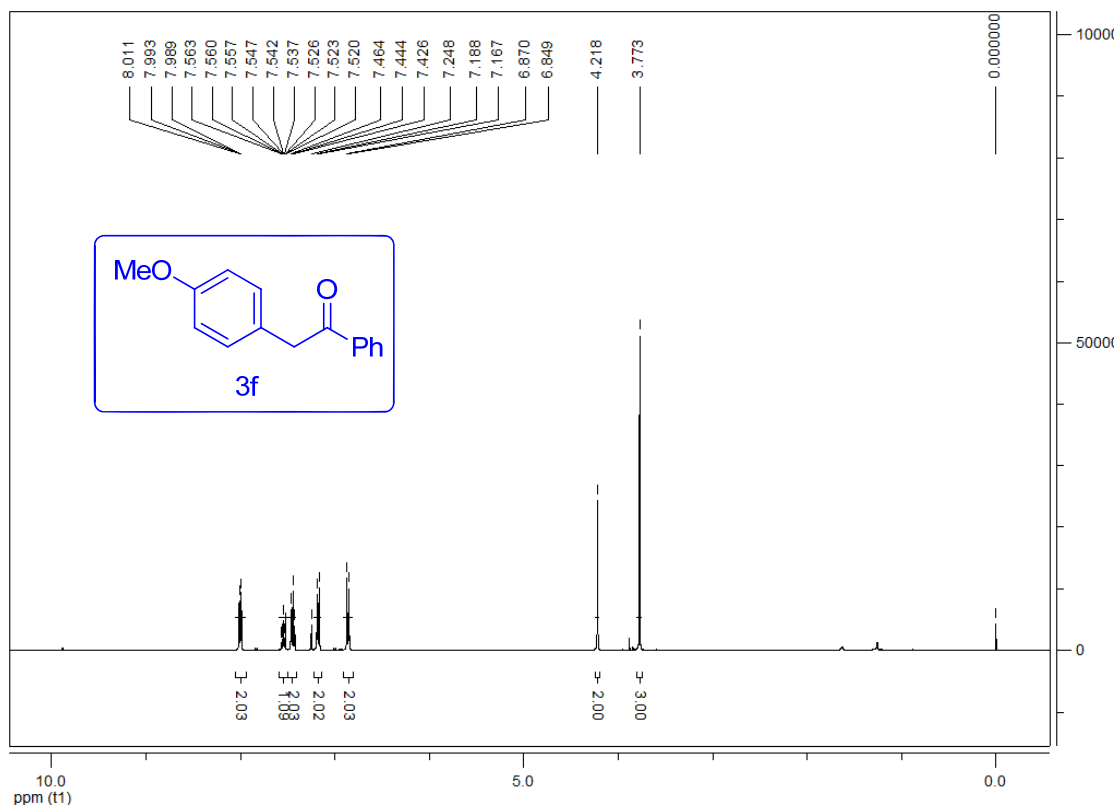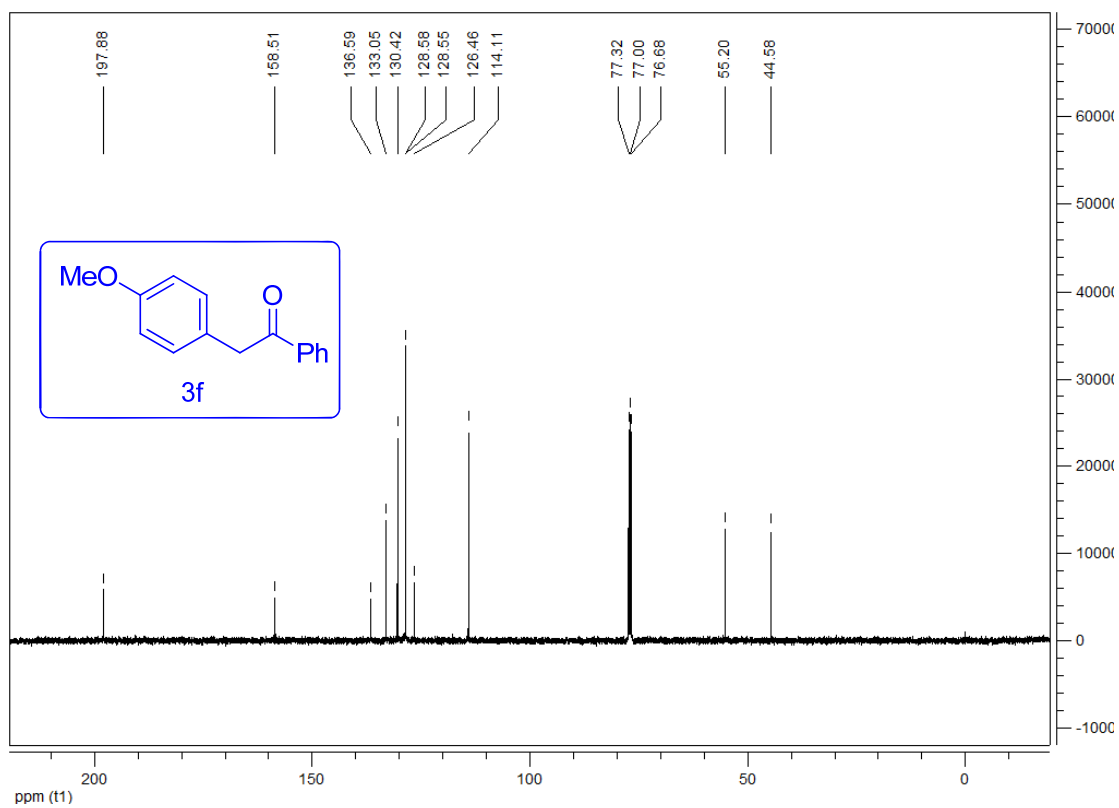

**2-(4-(Dimethylamino)phenyl)-1-phenylethanone (3g)**

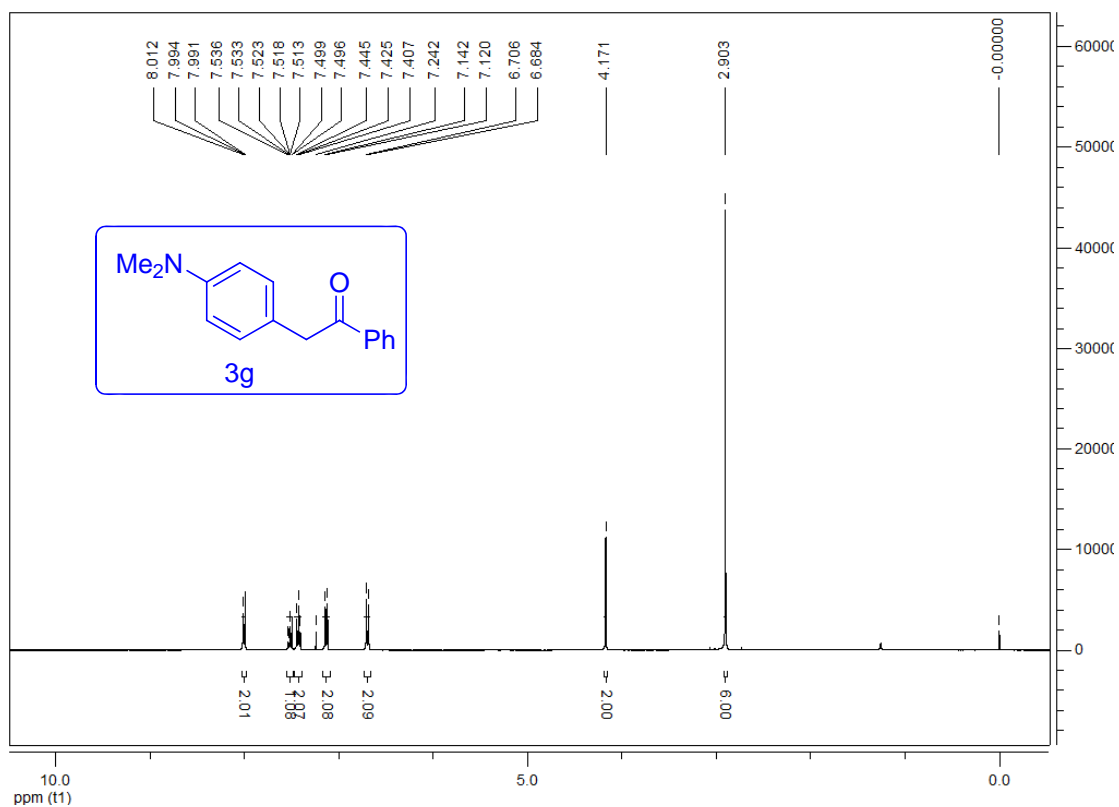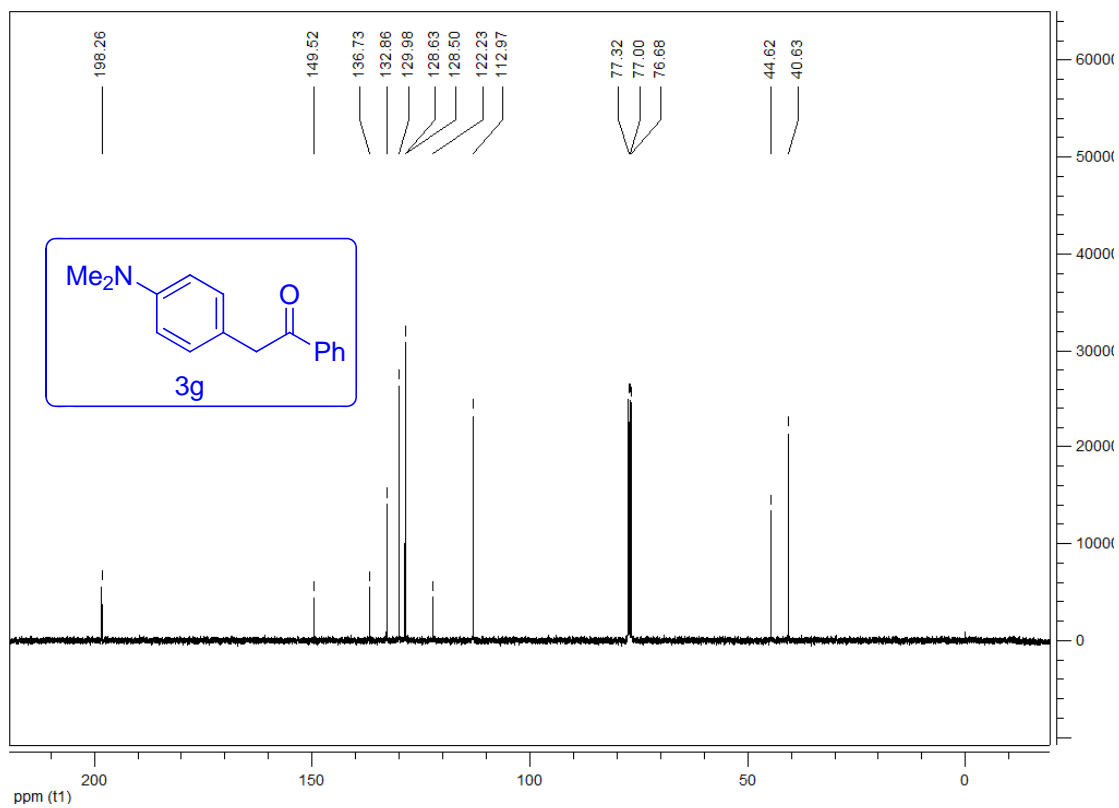

**2-(3,5-Dimethoxyphenyl)-1-phenylethanone (3h)**

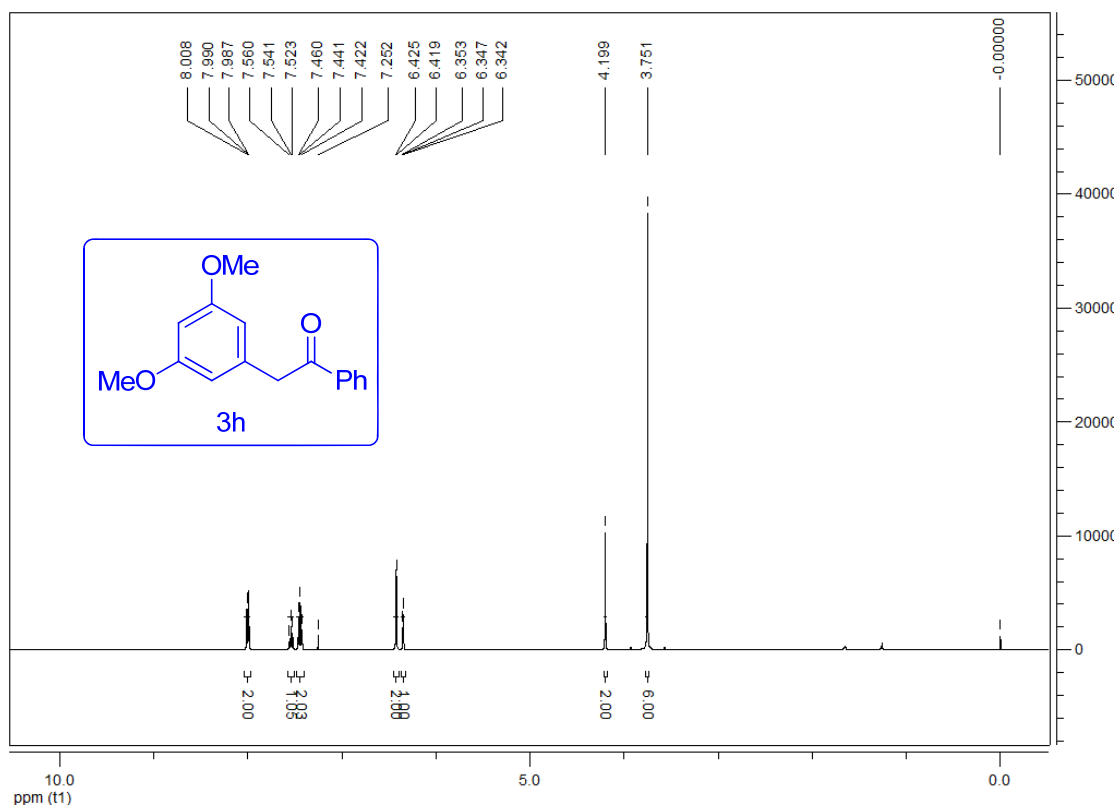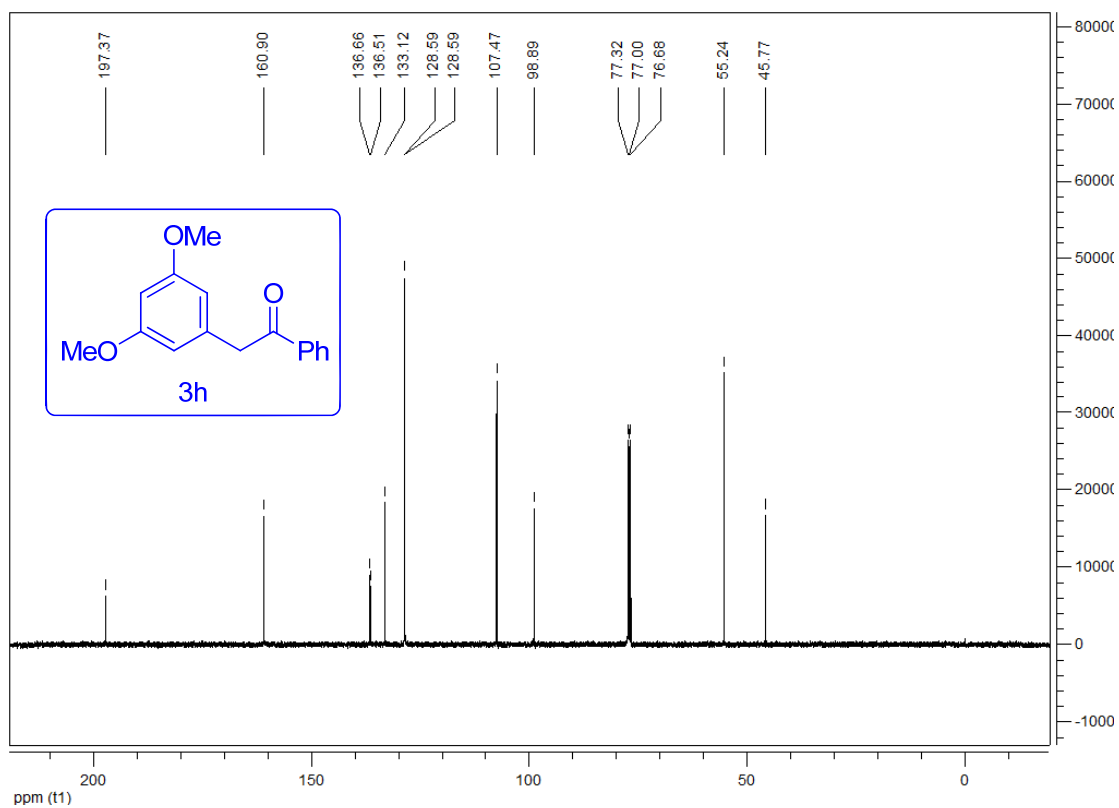

**2-(2,3-Dihydrobenzofuran-5-yl)-1-phenylethanone (3i)**

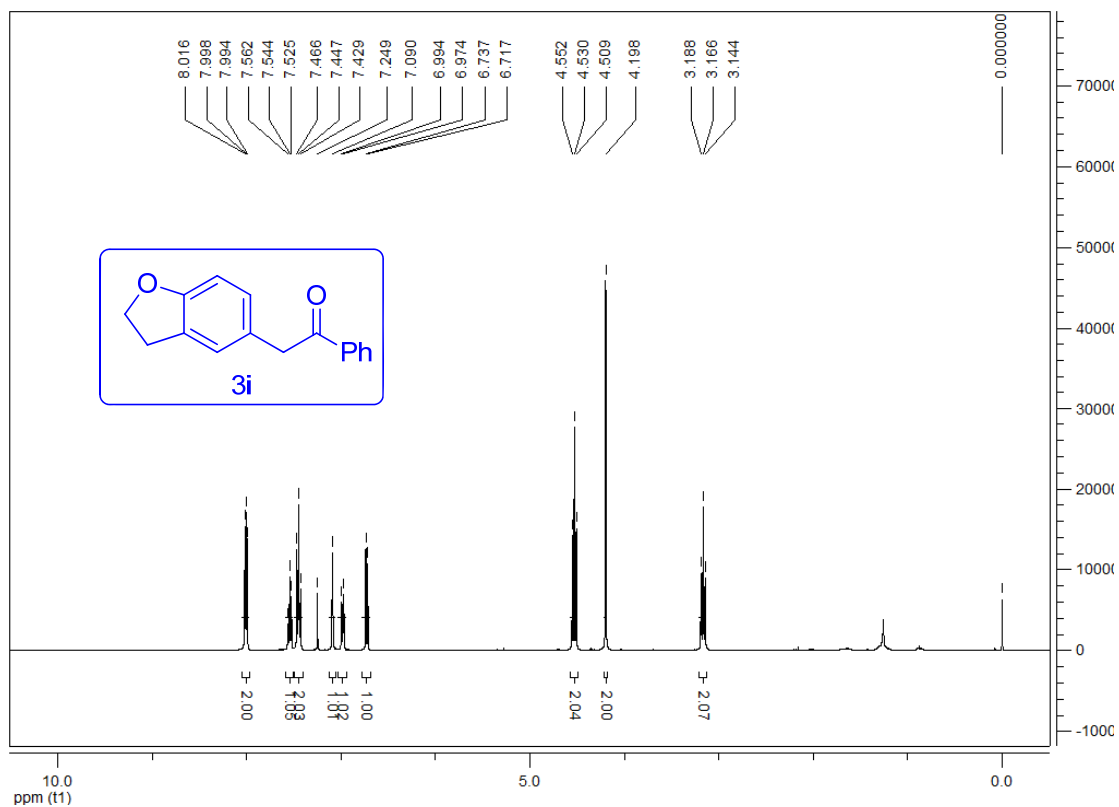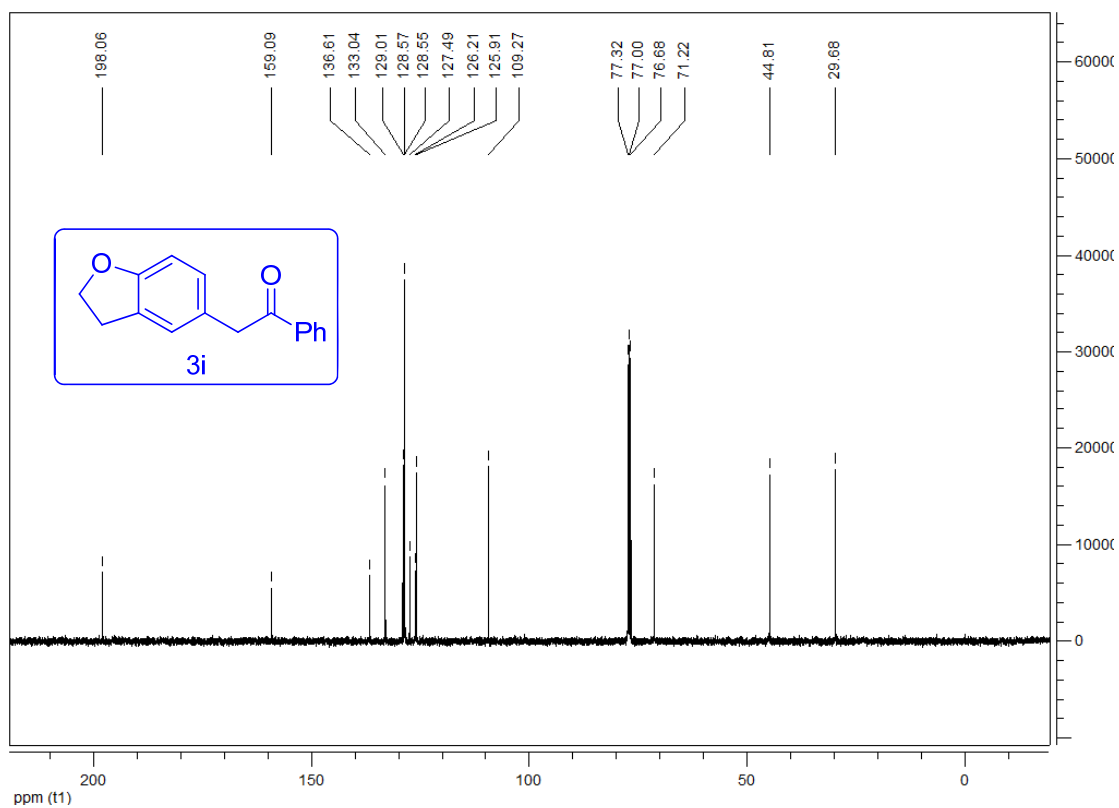

2-(Benzo[d][1,3]dioxol-5-yl)-1-phenylethanone (3j)

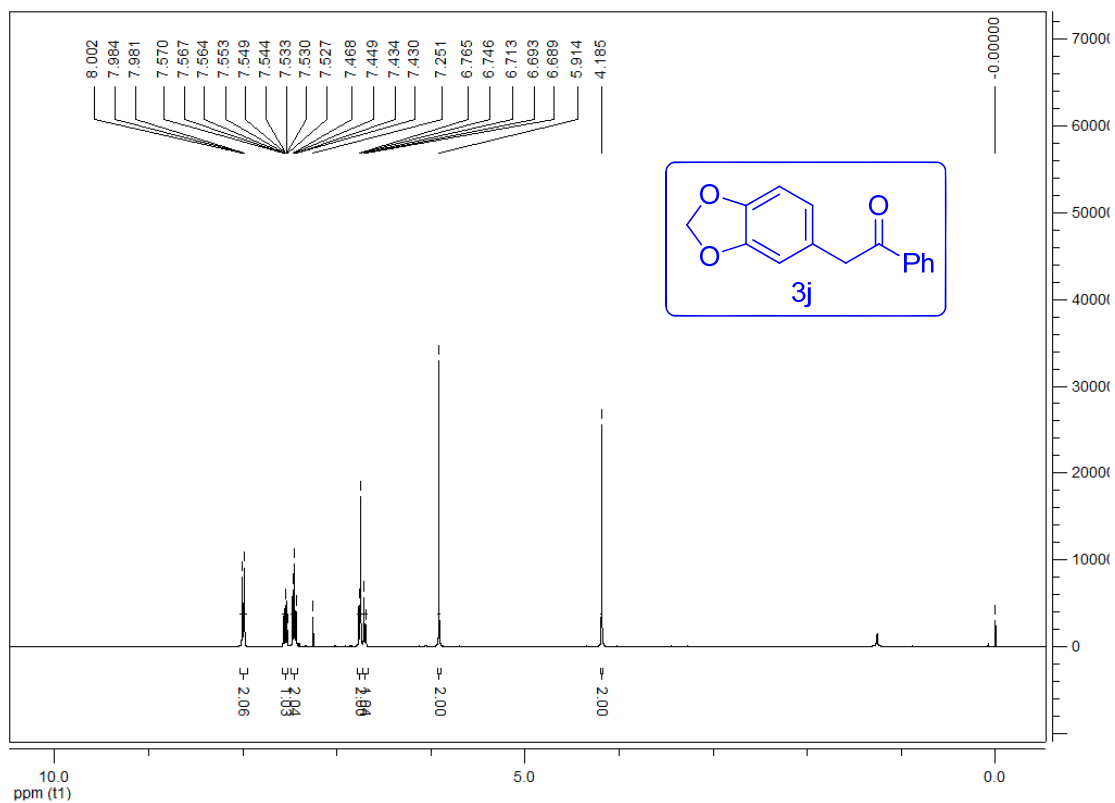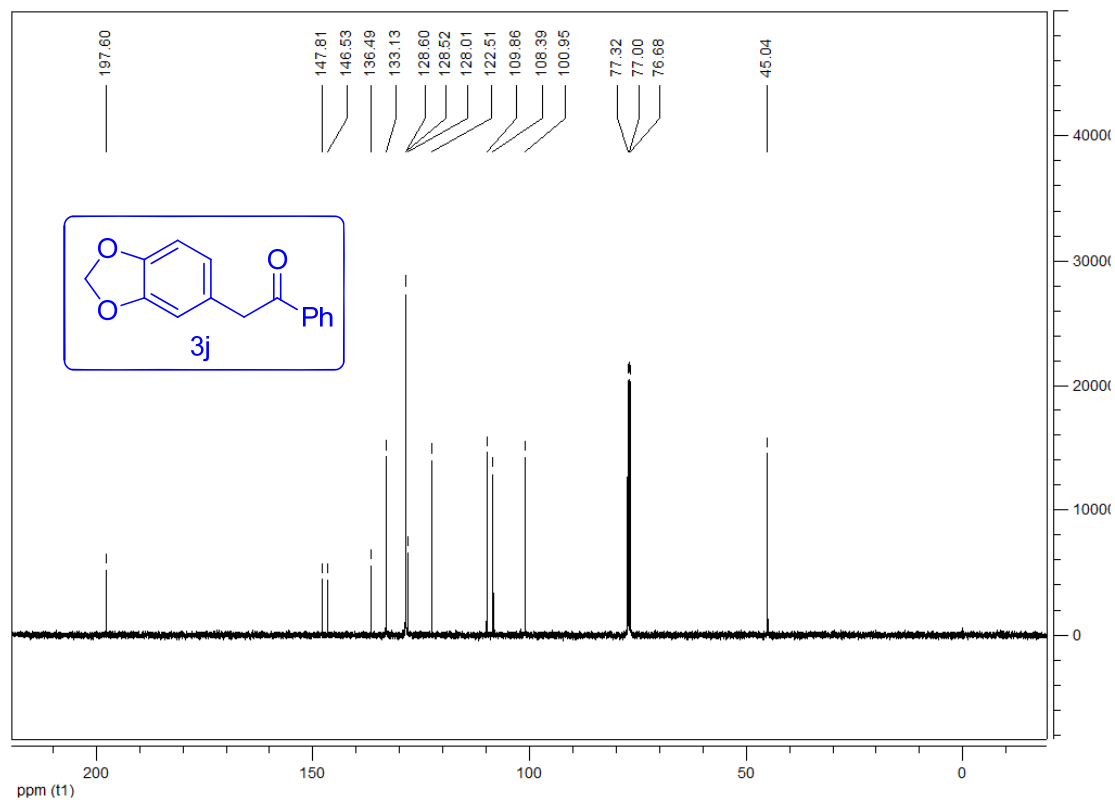

**2-(6-Methoxynaphthalen-2-yl)-1-phenylethanone (3k)**

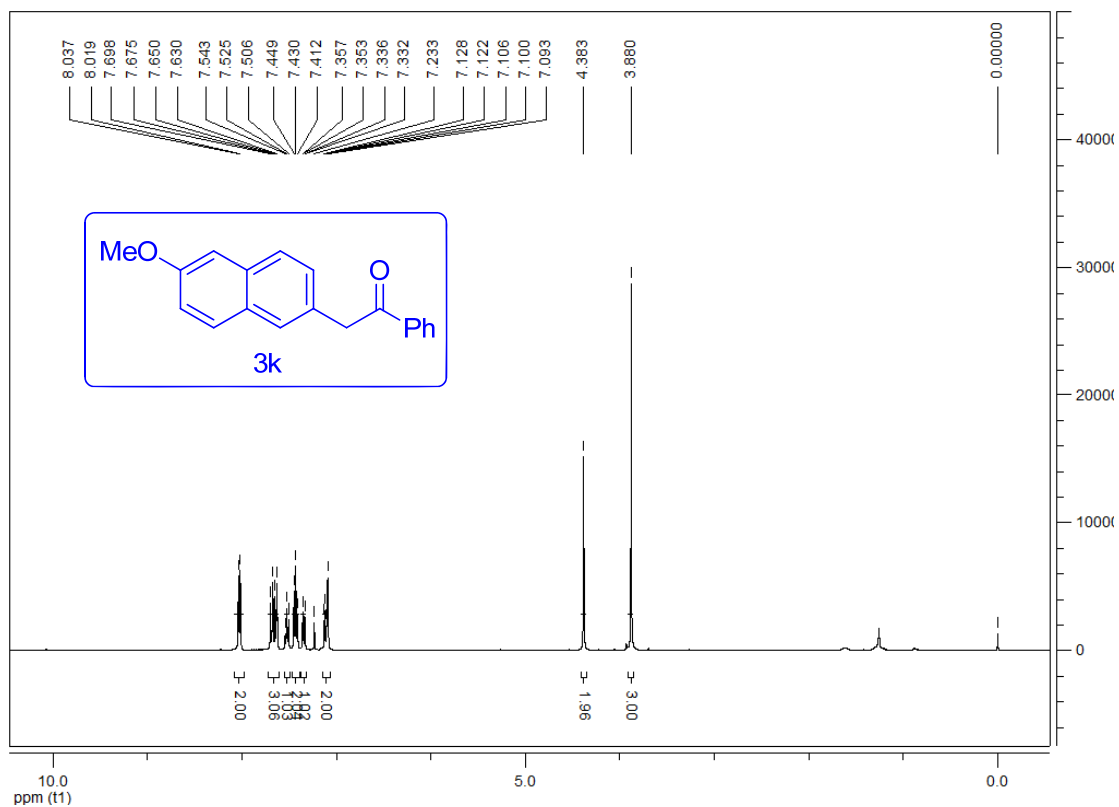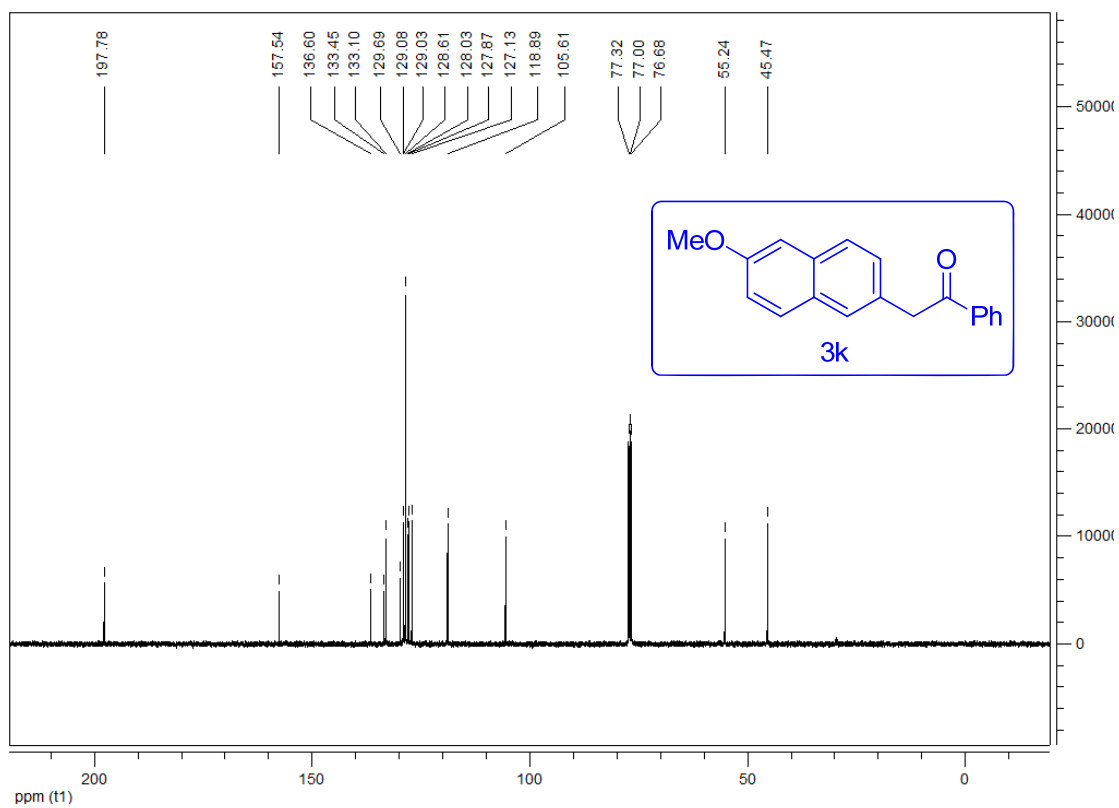

**2-(Furan-2-yl)-1-phenylethanone (3I)**

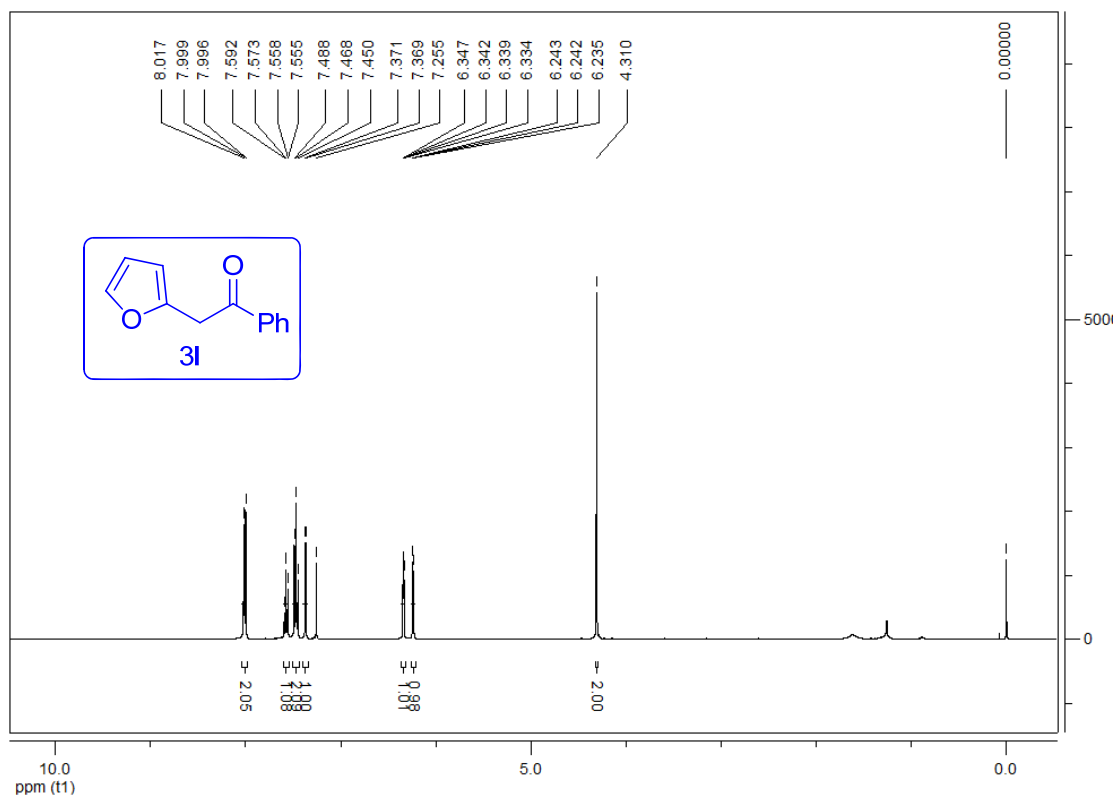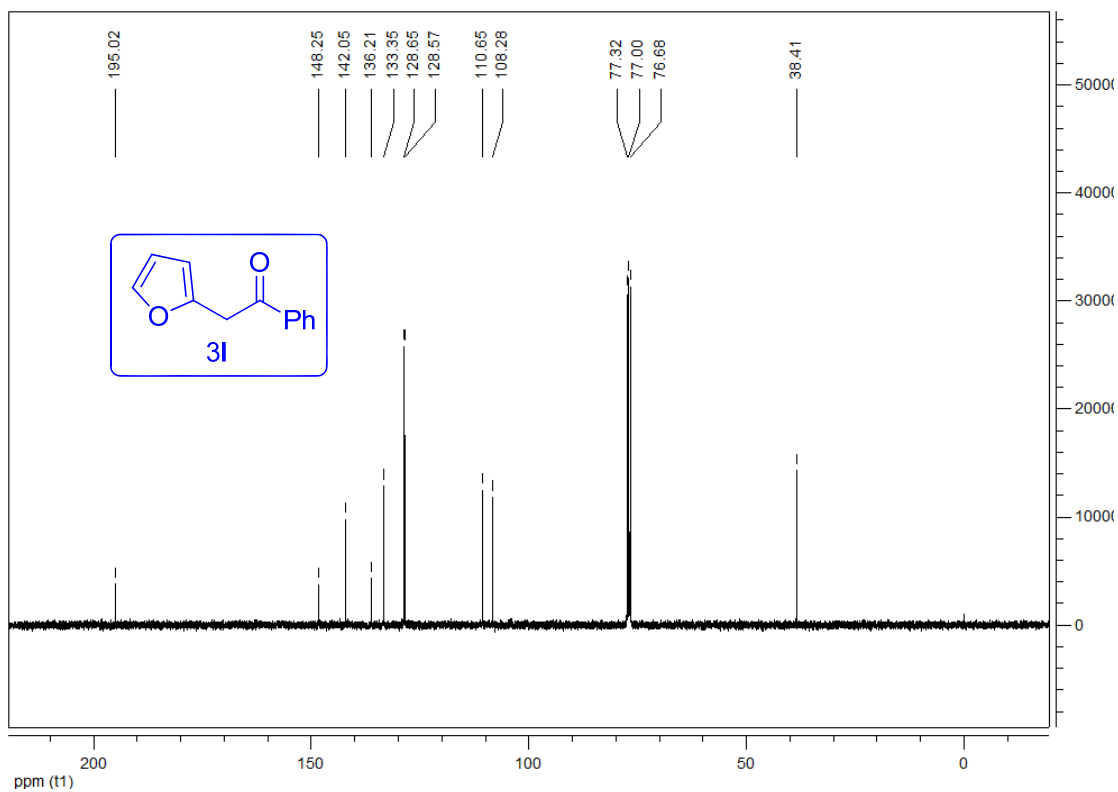



**1-Phenyl-2-(*o*-tolyl)ethanone (3m)**

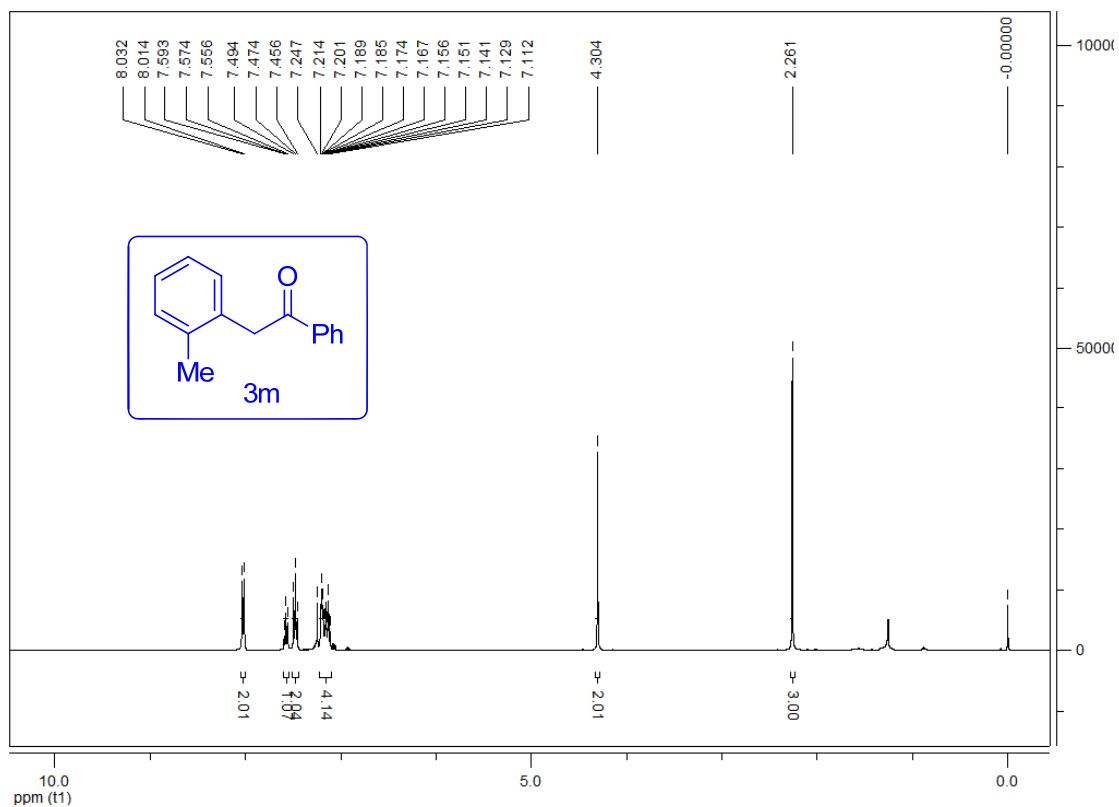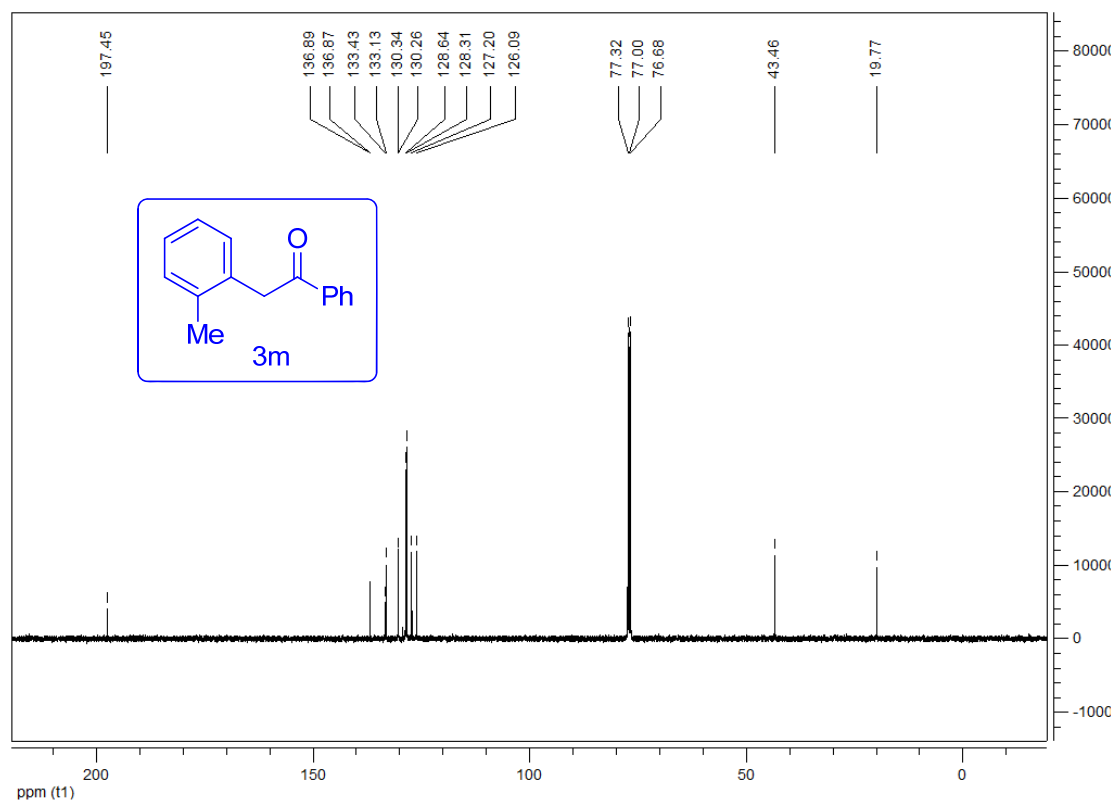

***1-Phenyl-2-(m-tolyl)ethanone (3n)***

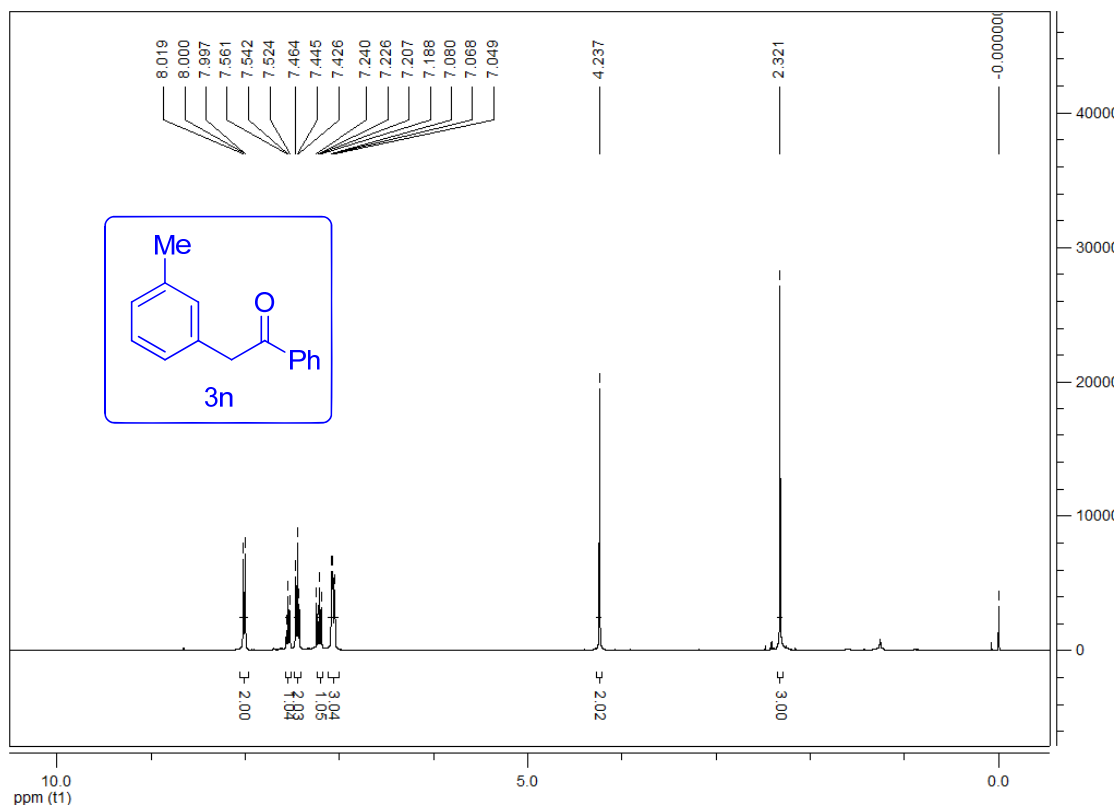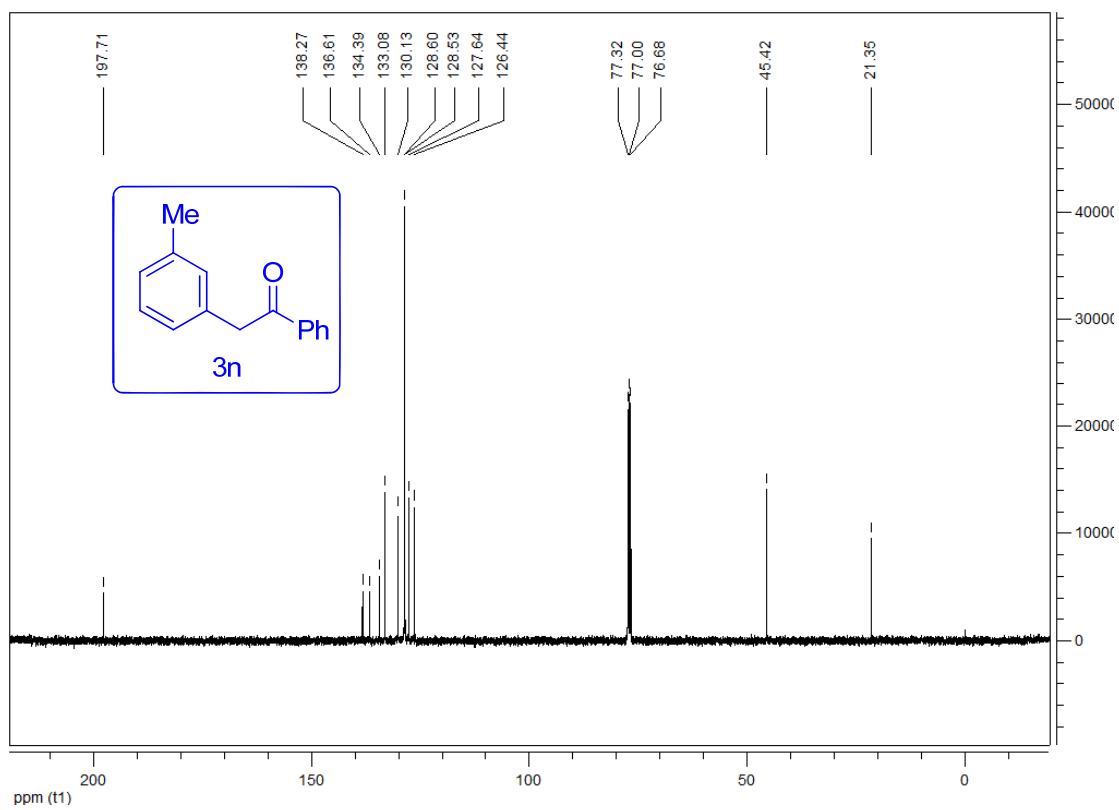

**2-(3-Bromophenyl)-1-phenylethanone (3o)**

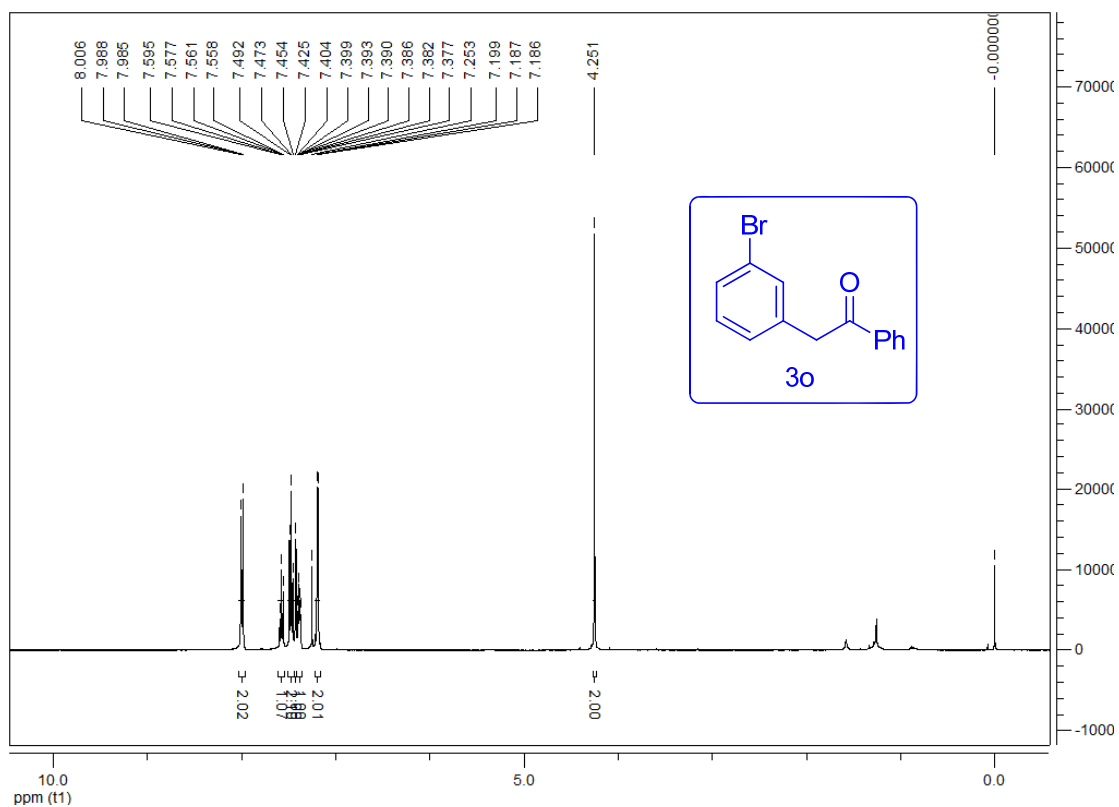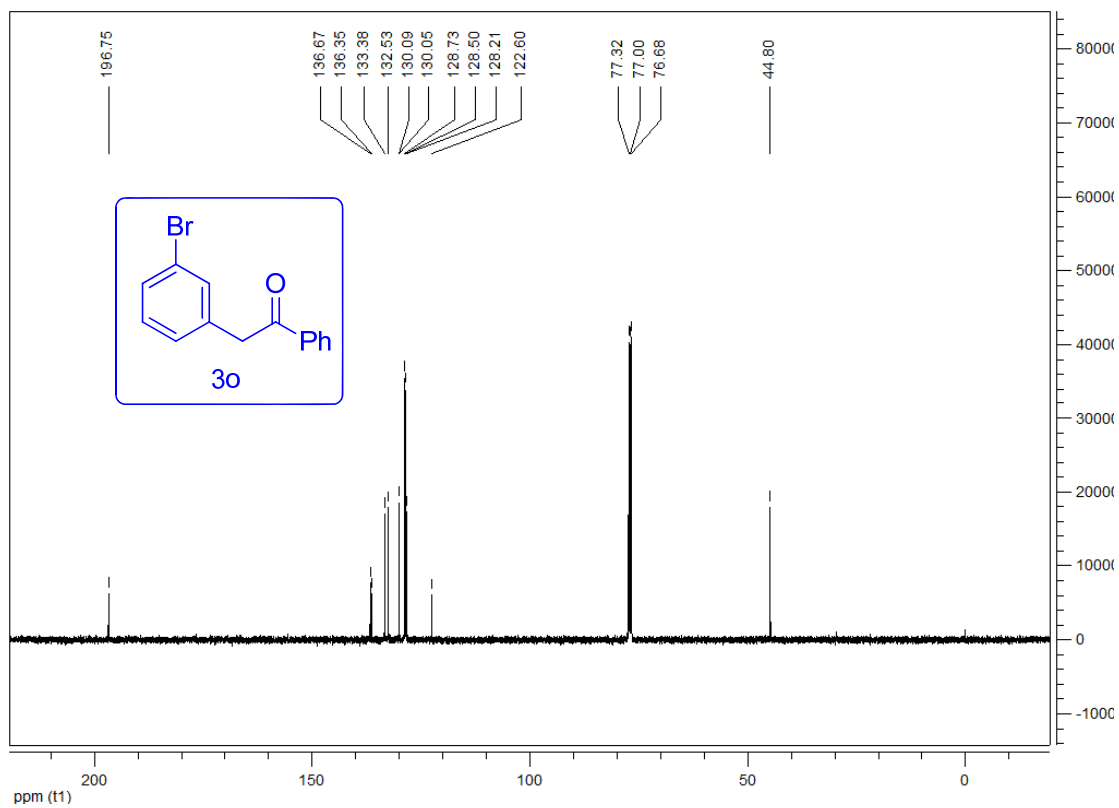

**Methyl 3-(2-oxo-2-phenylethyl)benzoate (3p)**

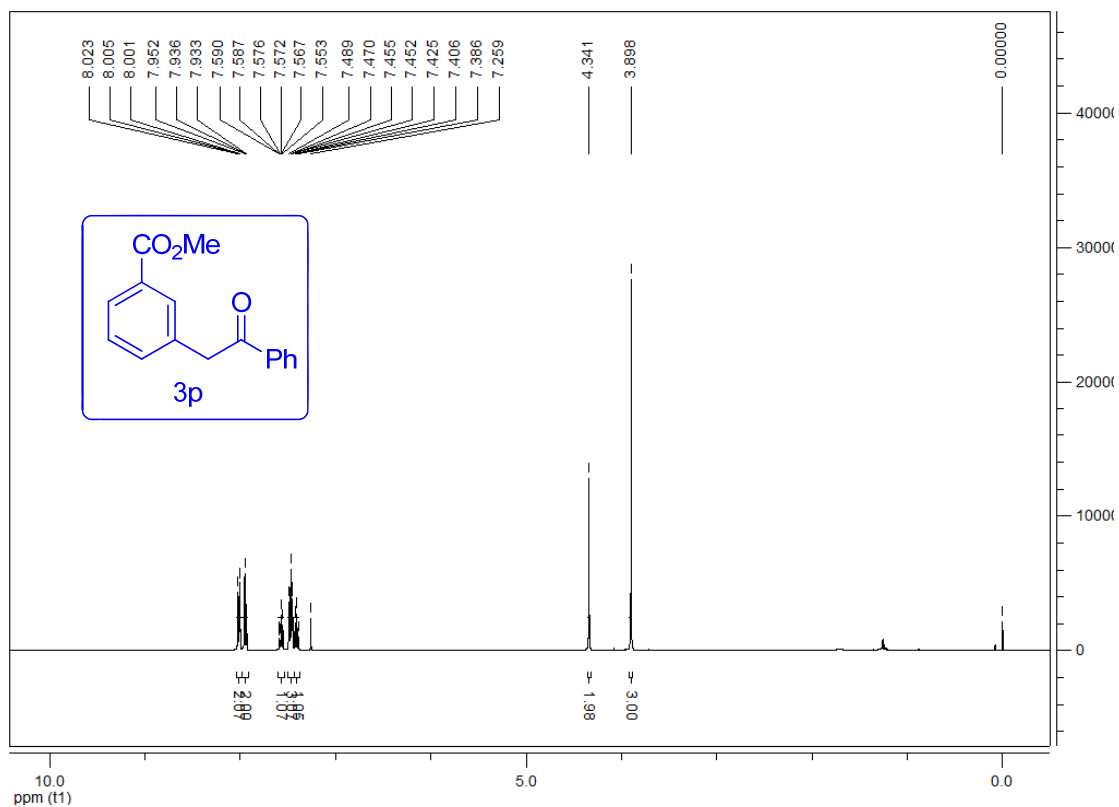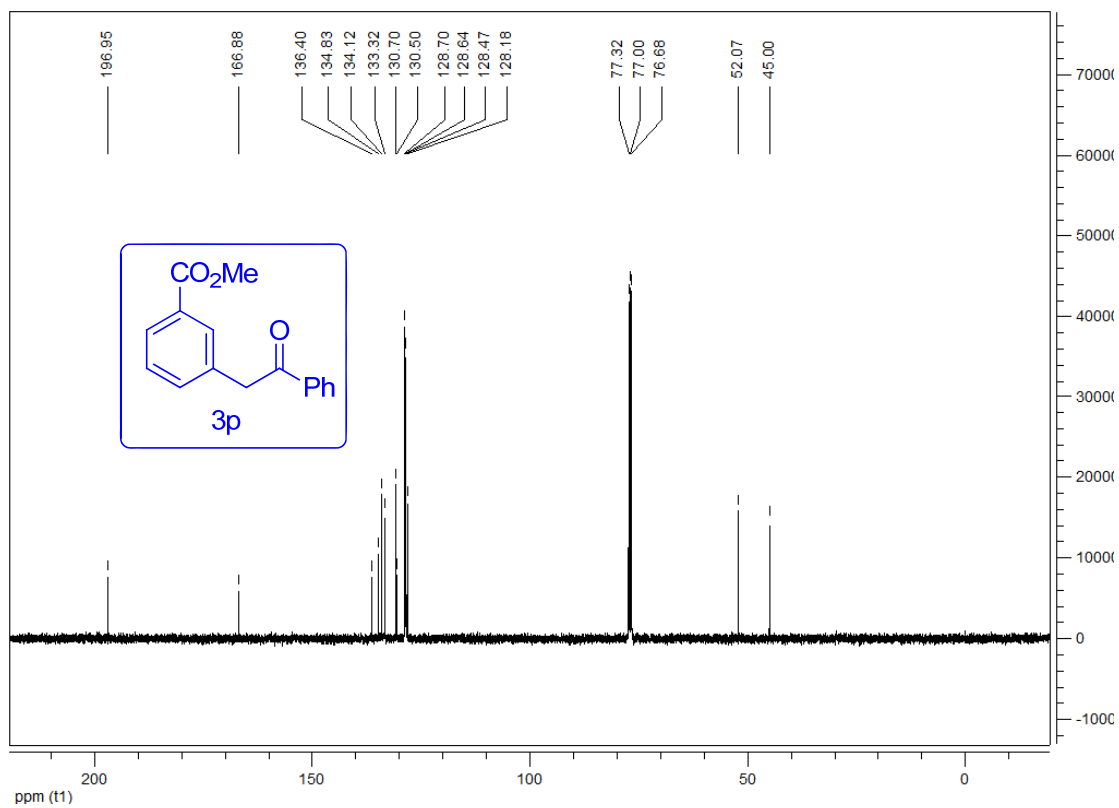

**2-Phenyl-1-(o-tolyl)ethanone (4a)**

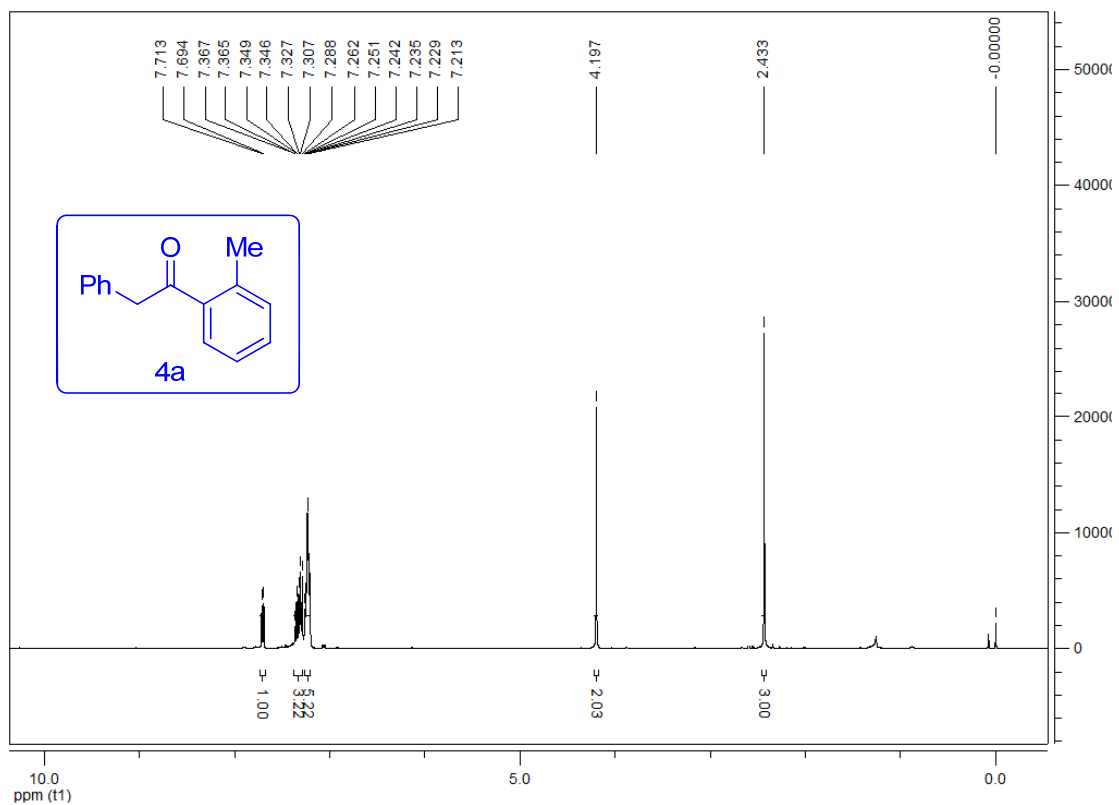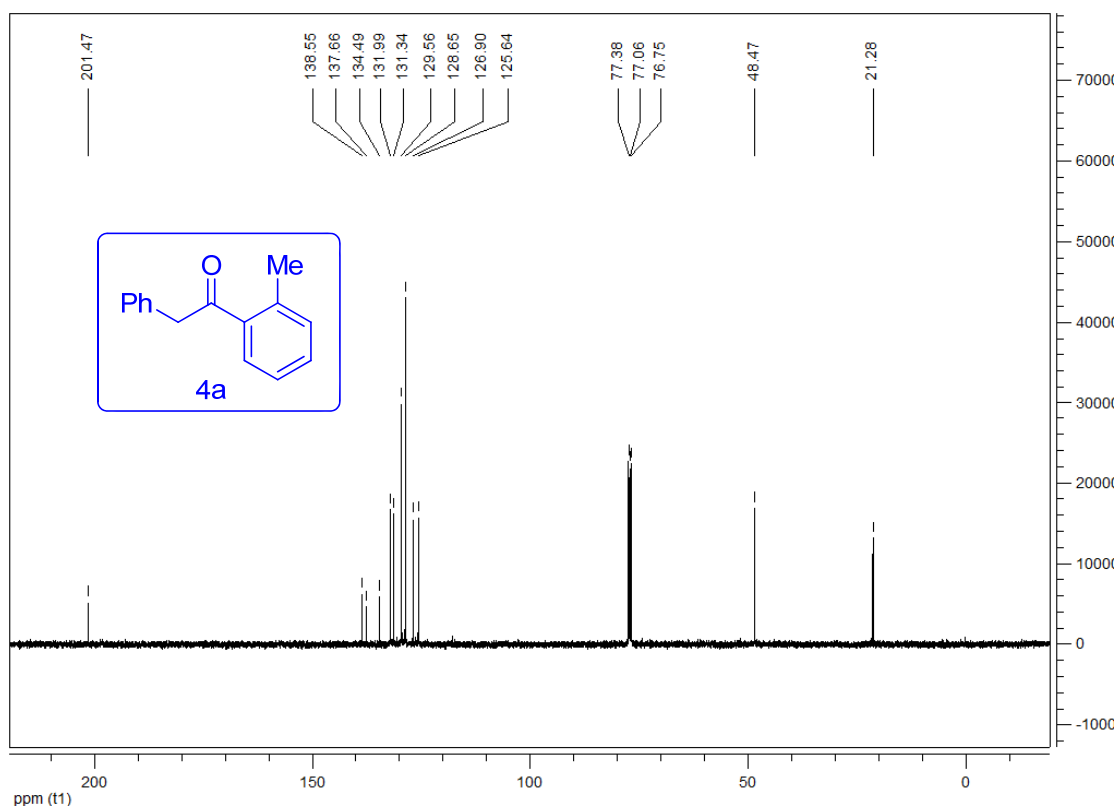

**1-(3-Chlorophenyl)-2-phenylethanone (4b)**

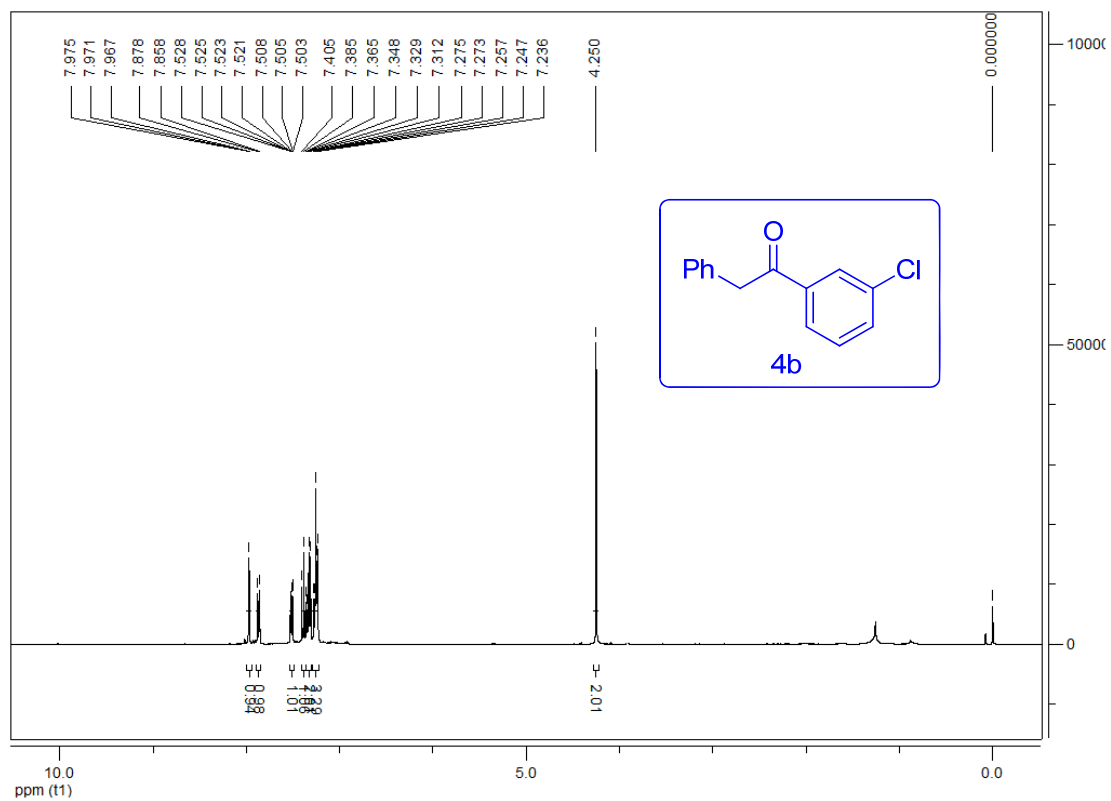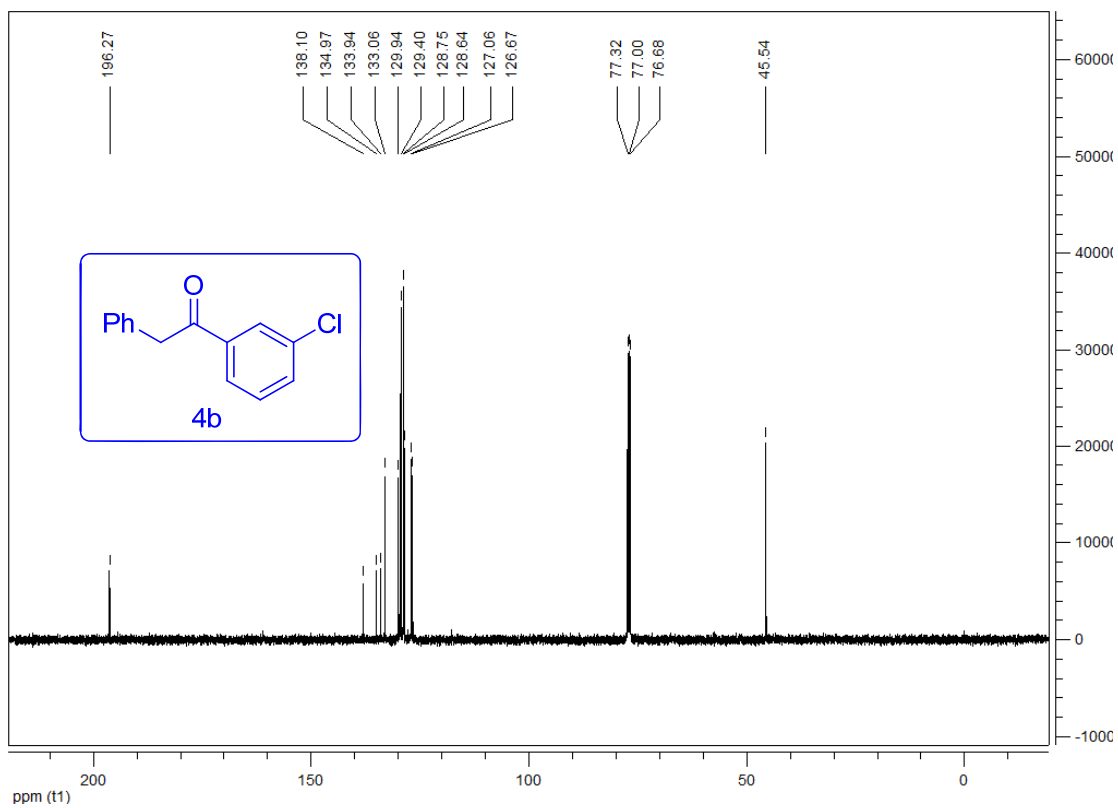

**1-(3-Methoxyphenyl)-2-phenylethanone (4c)**

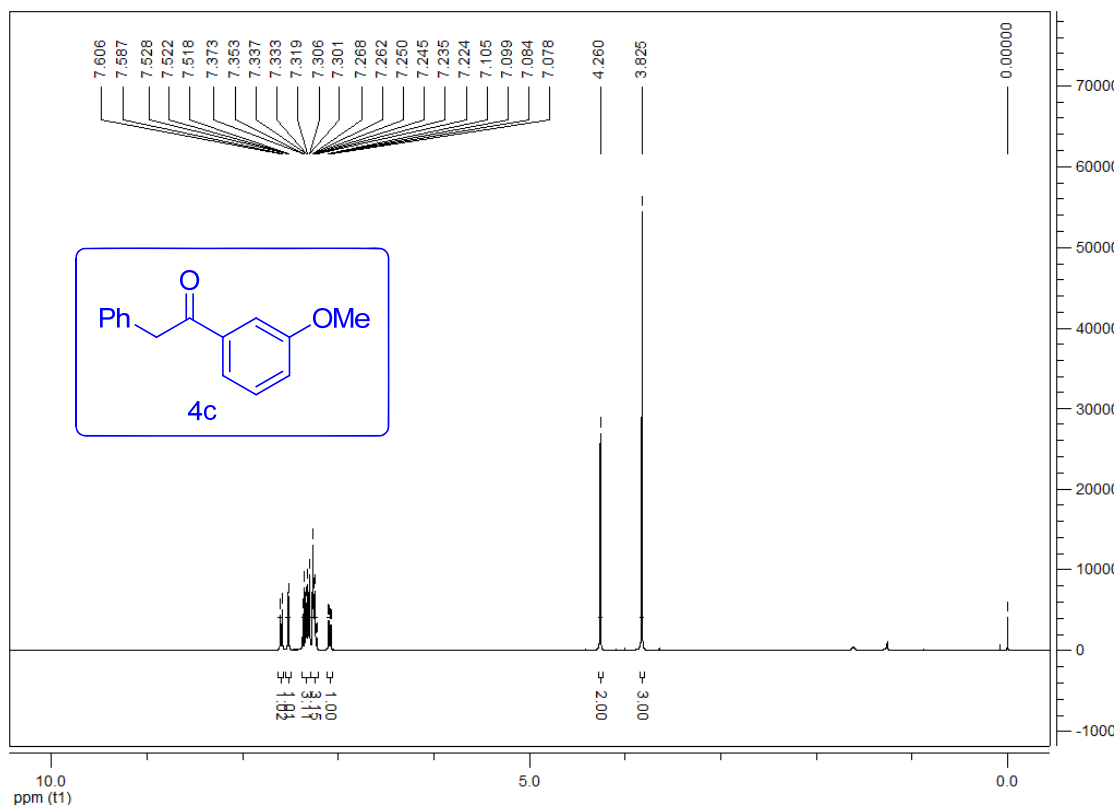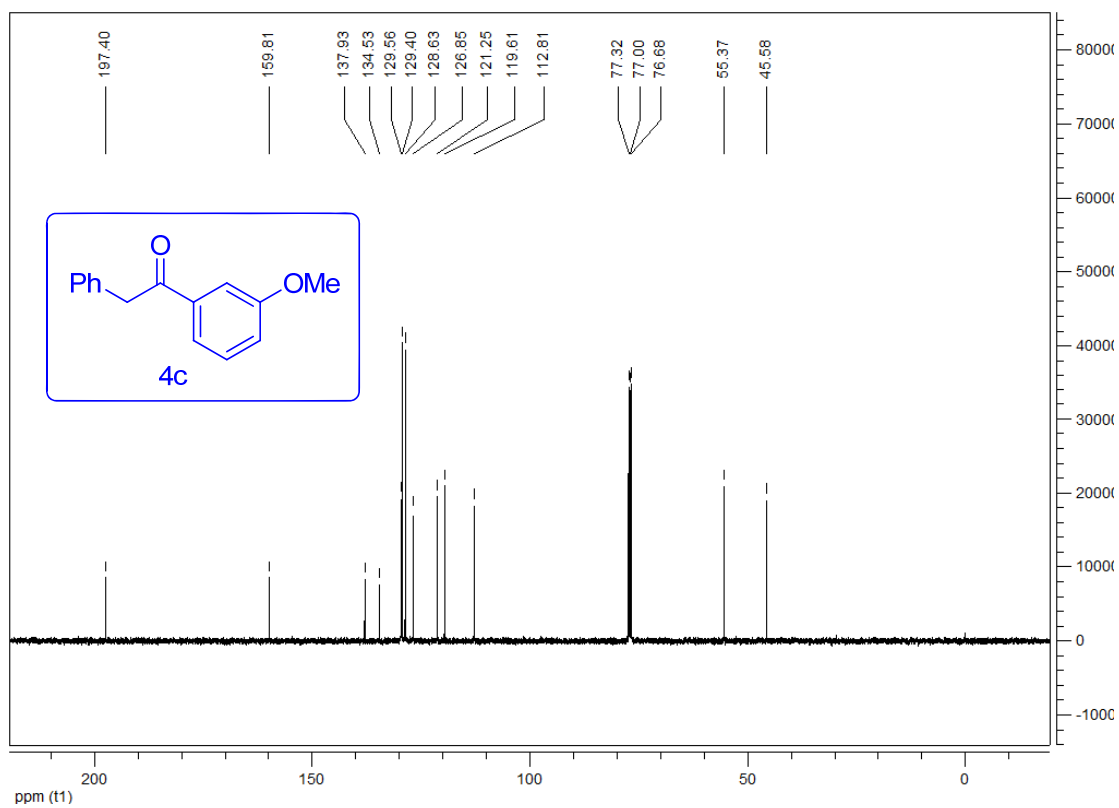

**2-Phenyl-1-(p-tolyl)ethanone (4d)**

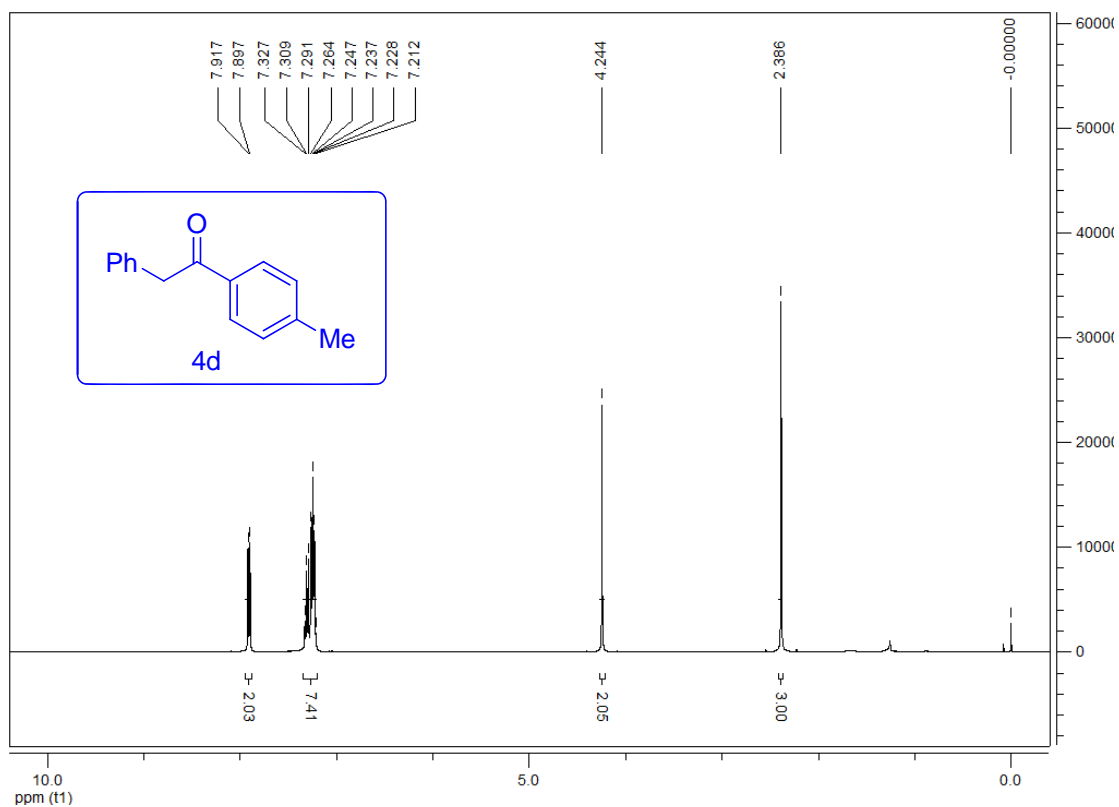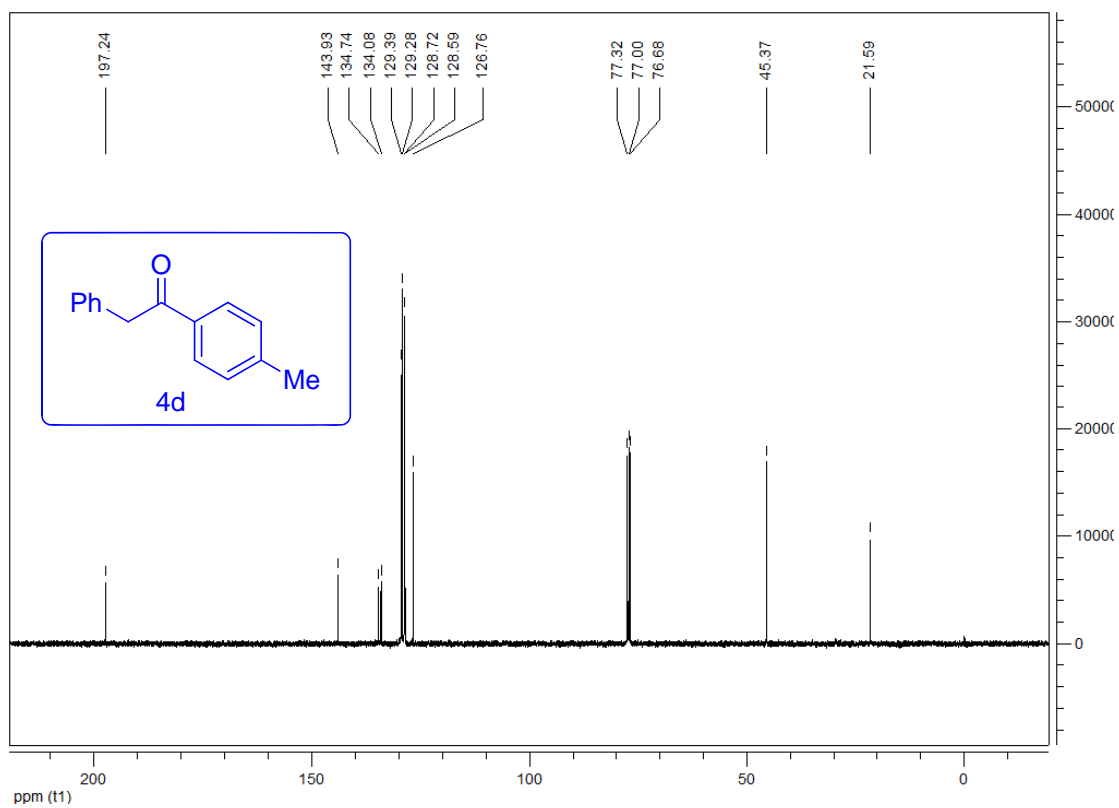



*1-([1,1'-Biphenyl]-4-yl)-2-phenylethanone (4e)*

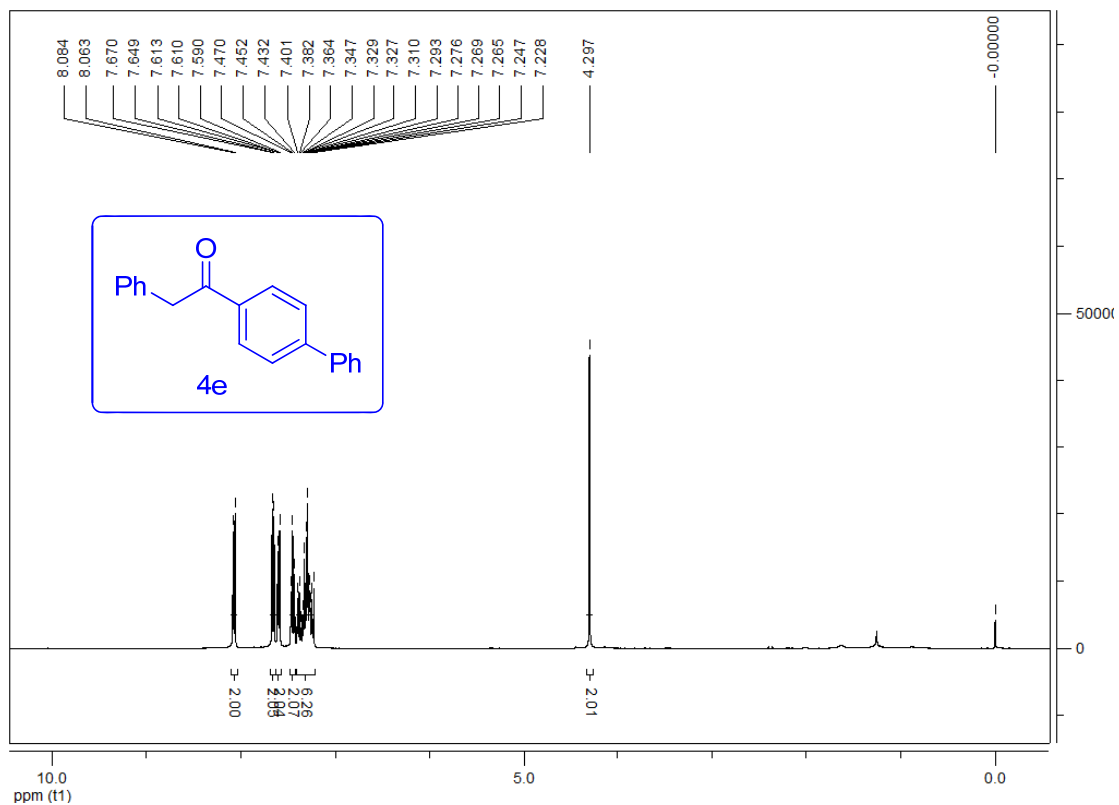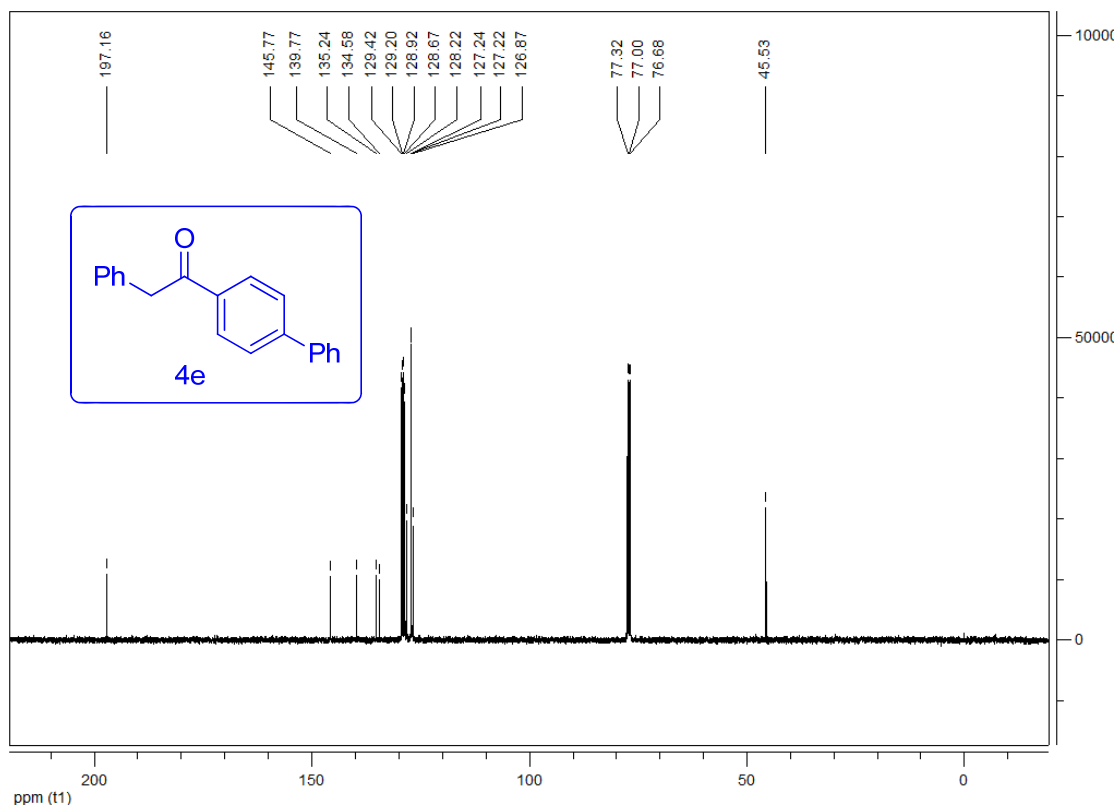

**1-(4-Methoxyphenyl)-2-phenylethanone (4f)**

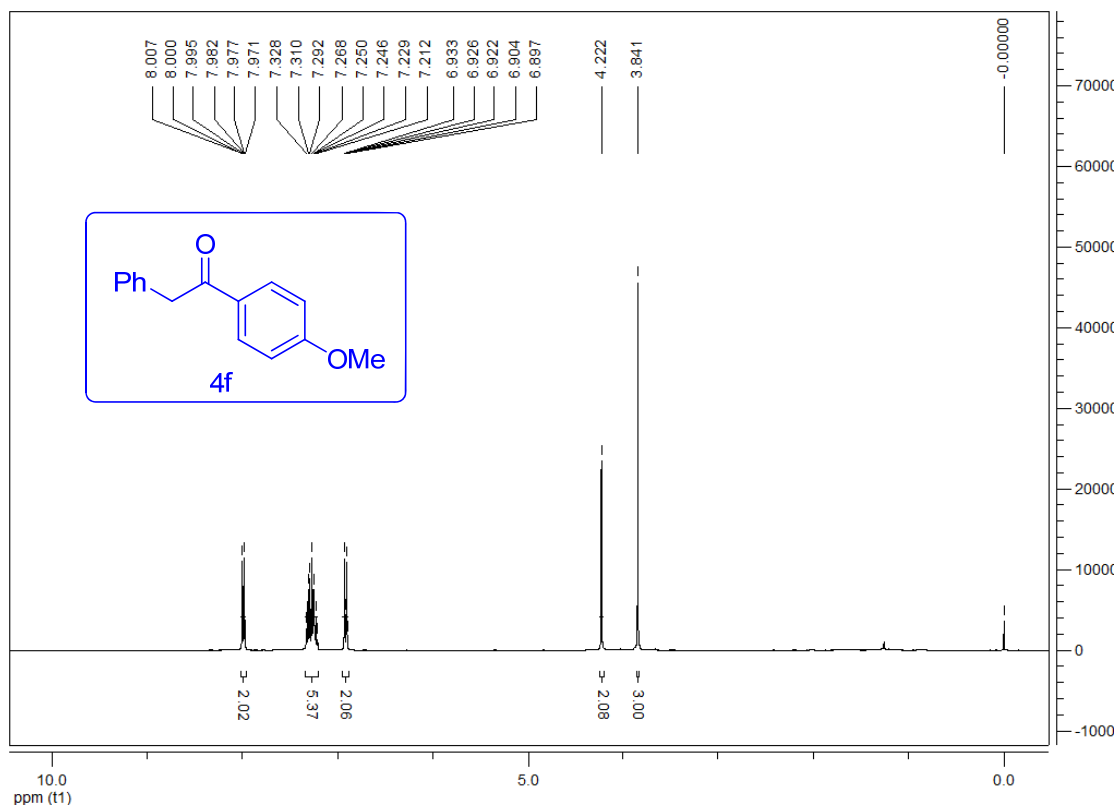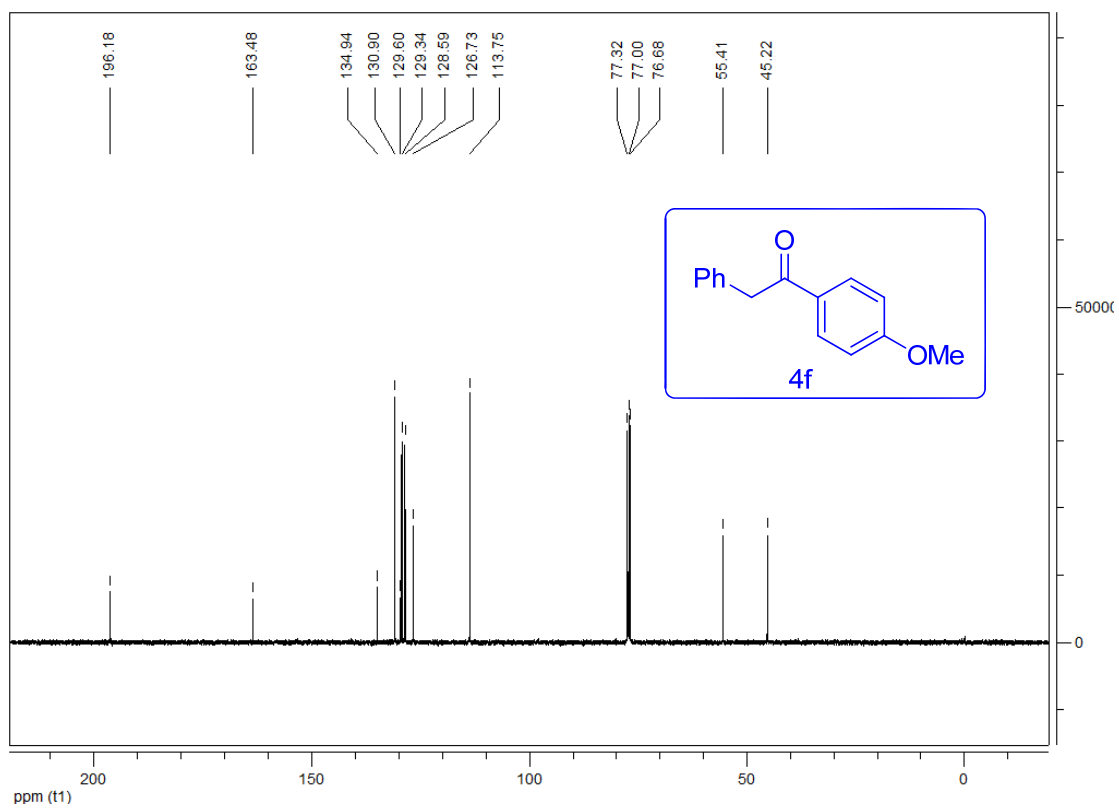

**1-(4-Fluorophenyl)-2-phenylethanone (4g)**

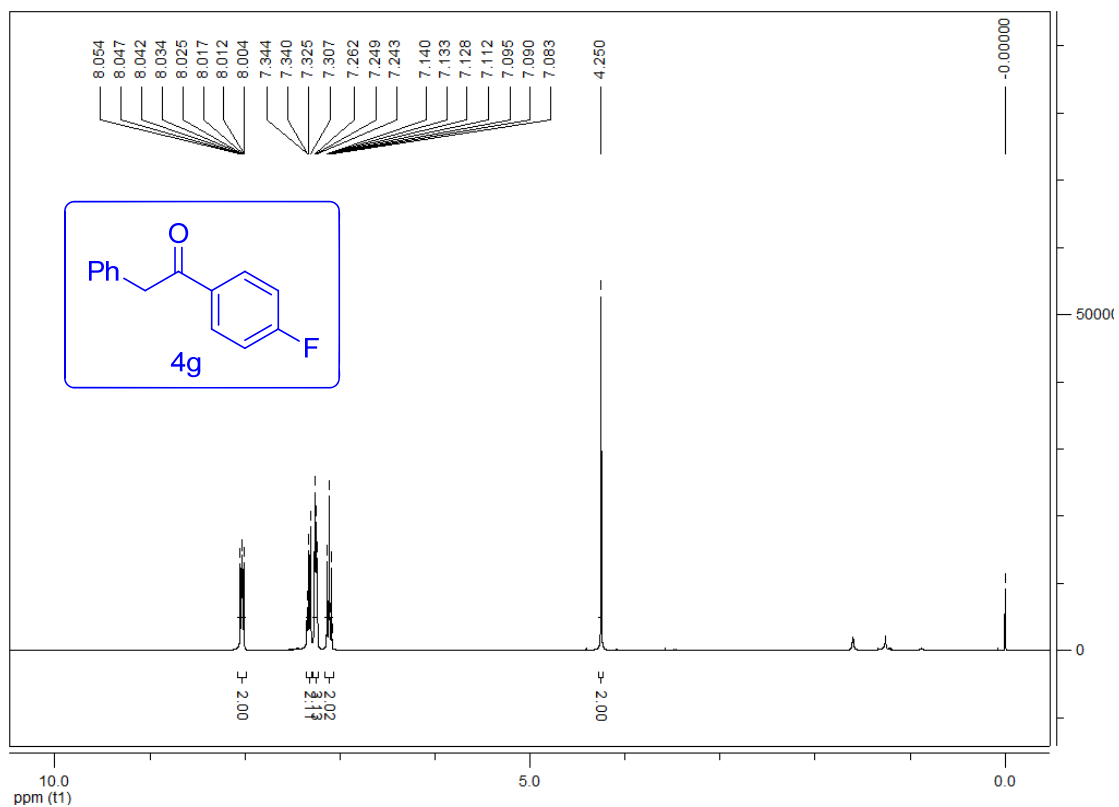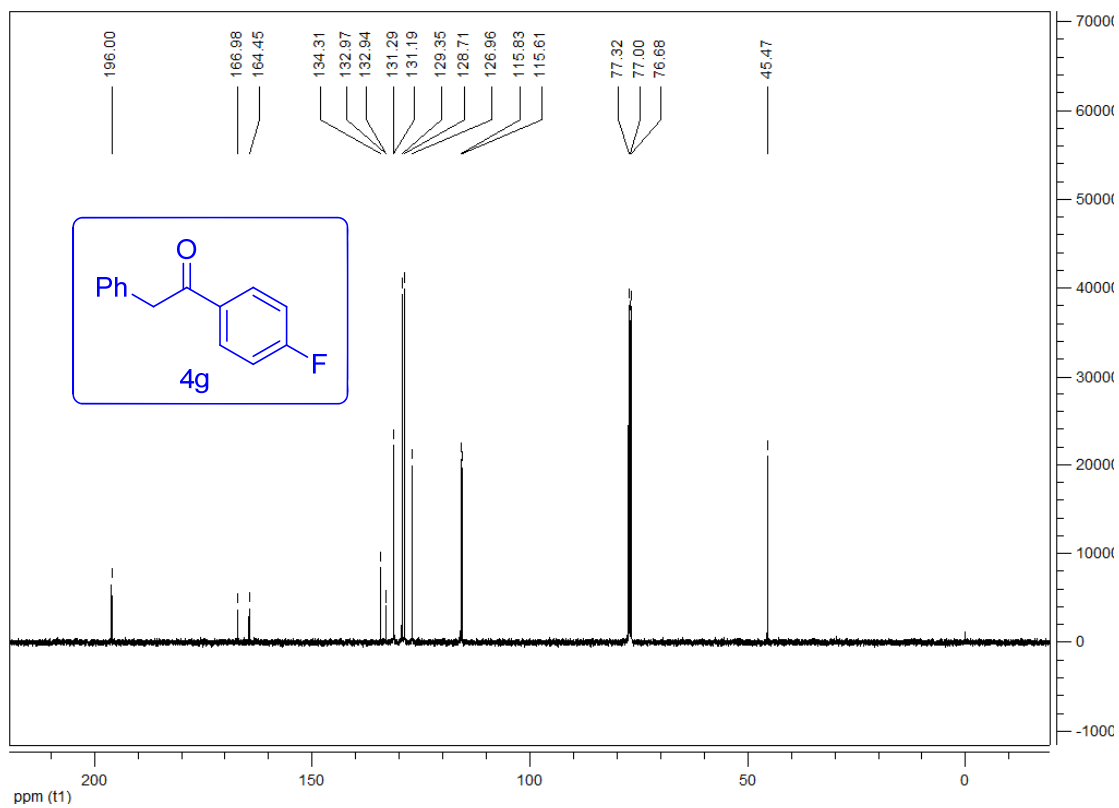

**1-(4-Chlorophenyl)-2-phenylethanone (4h)**

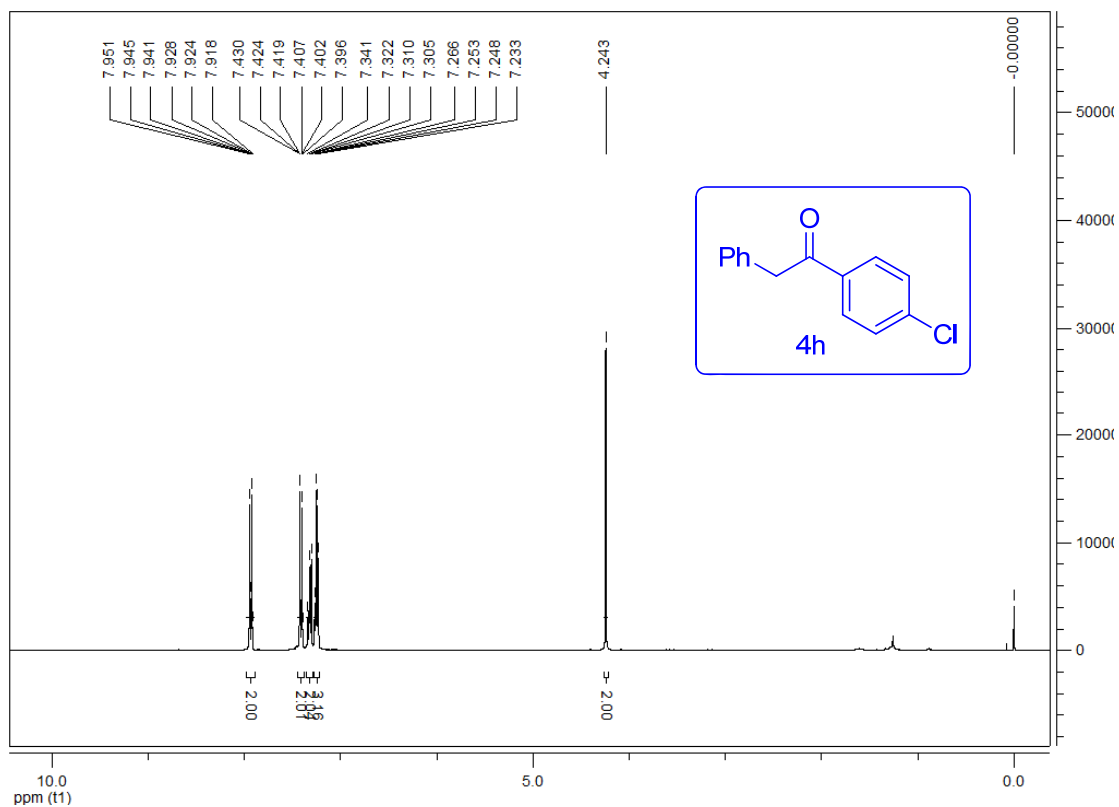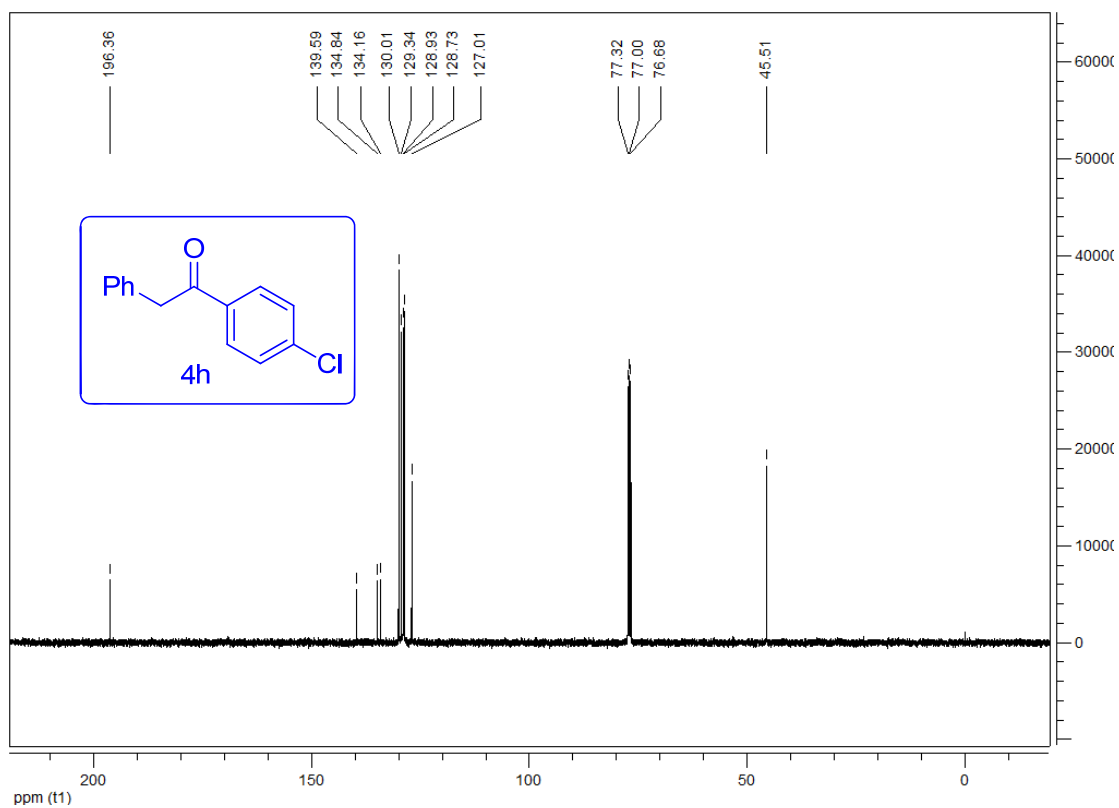

*1-(Naphthalen-2-yl)-2-phenylethanone (4i)*

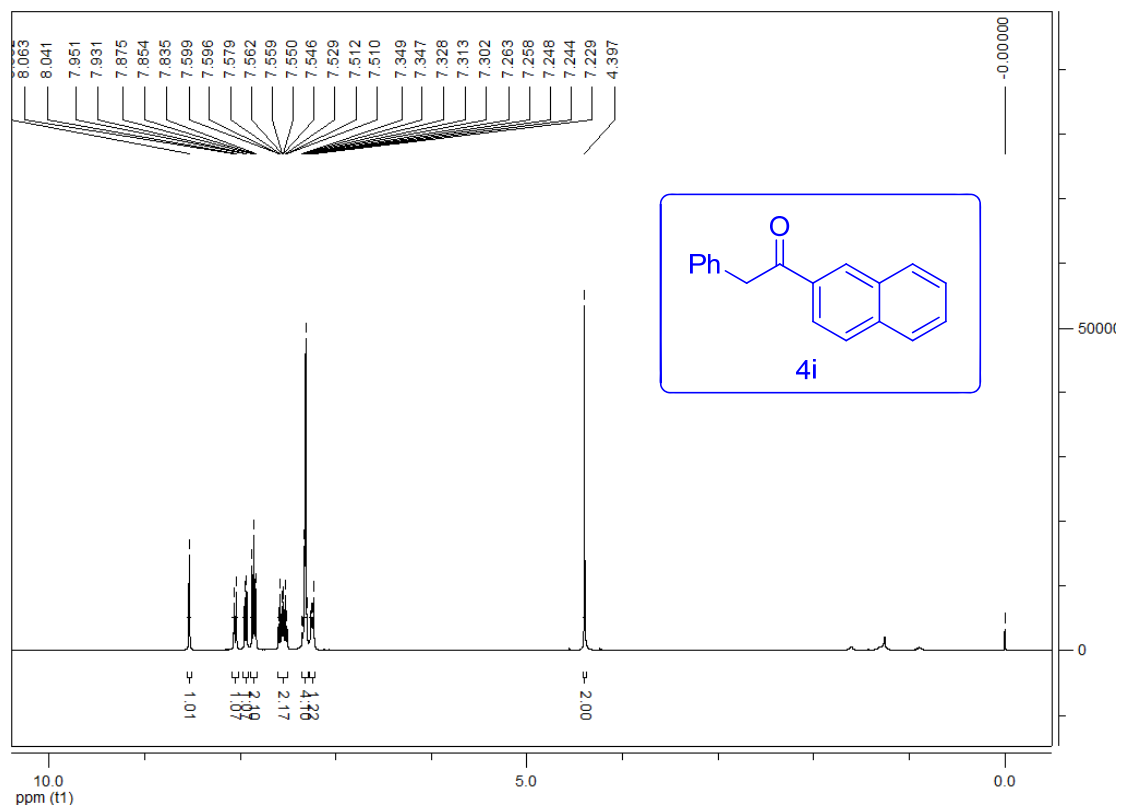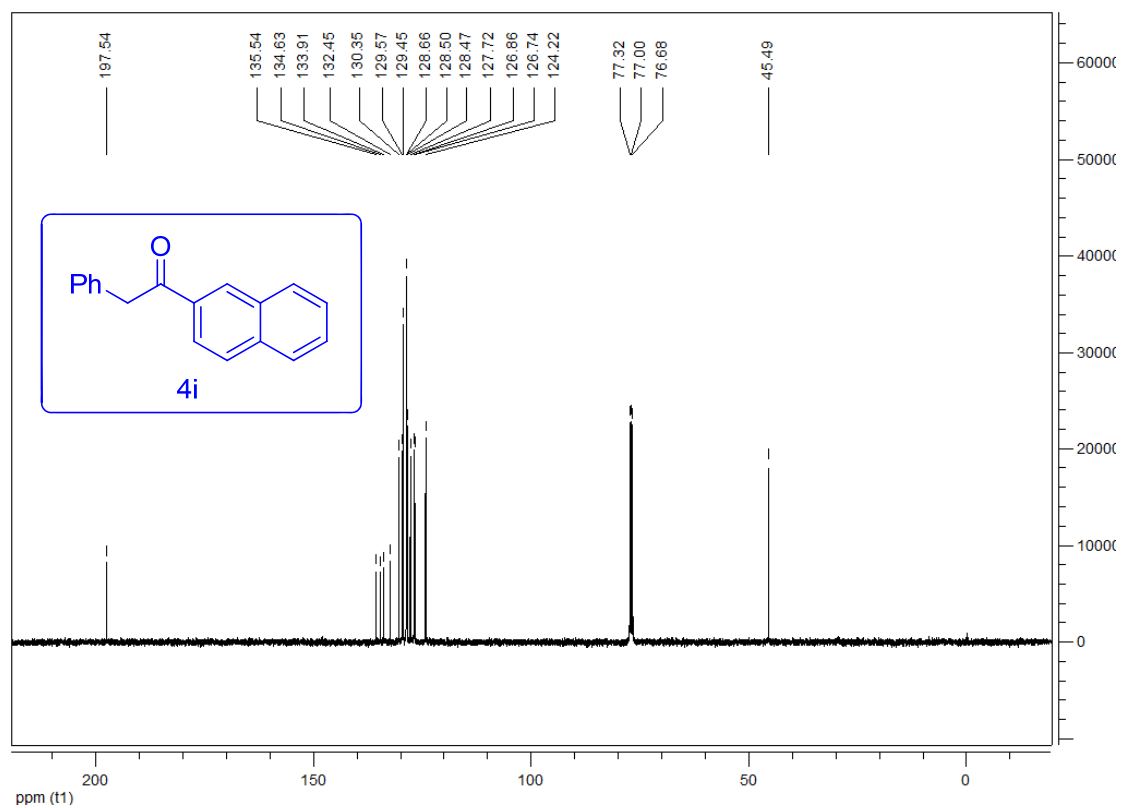

**2-Phenyl-1-(thiophen-2-yl)ethanone (4j)**

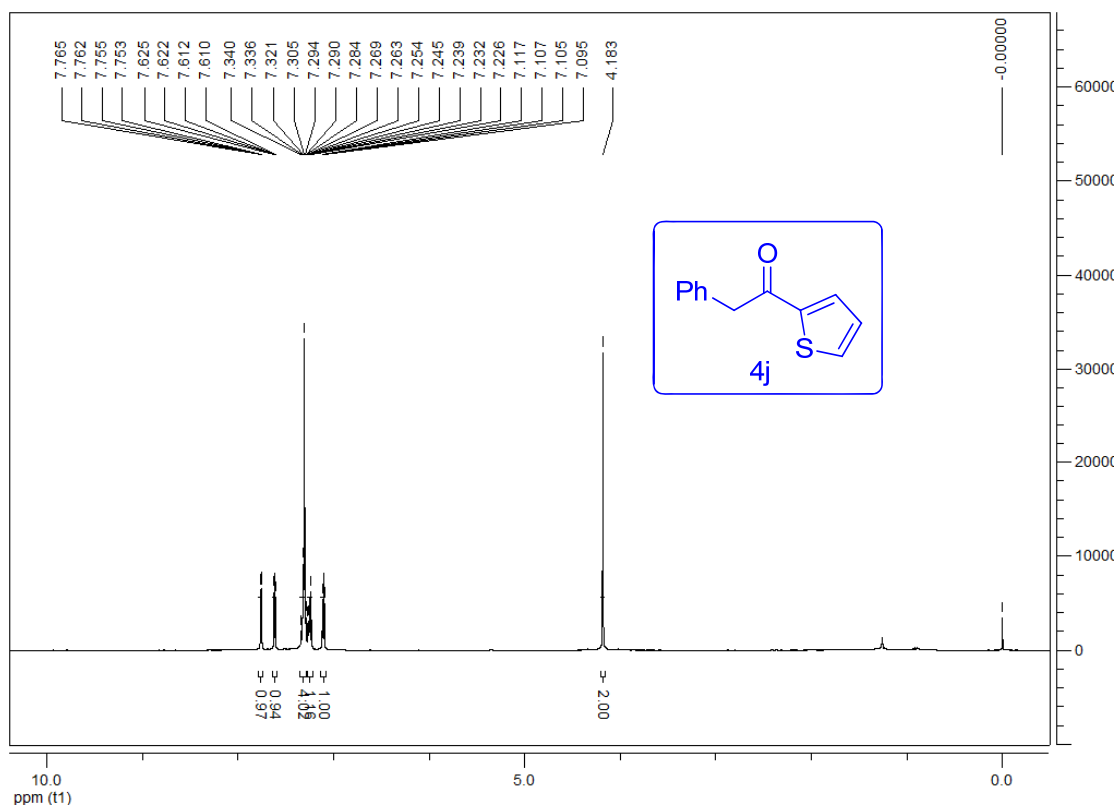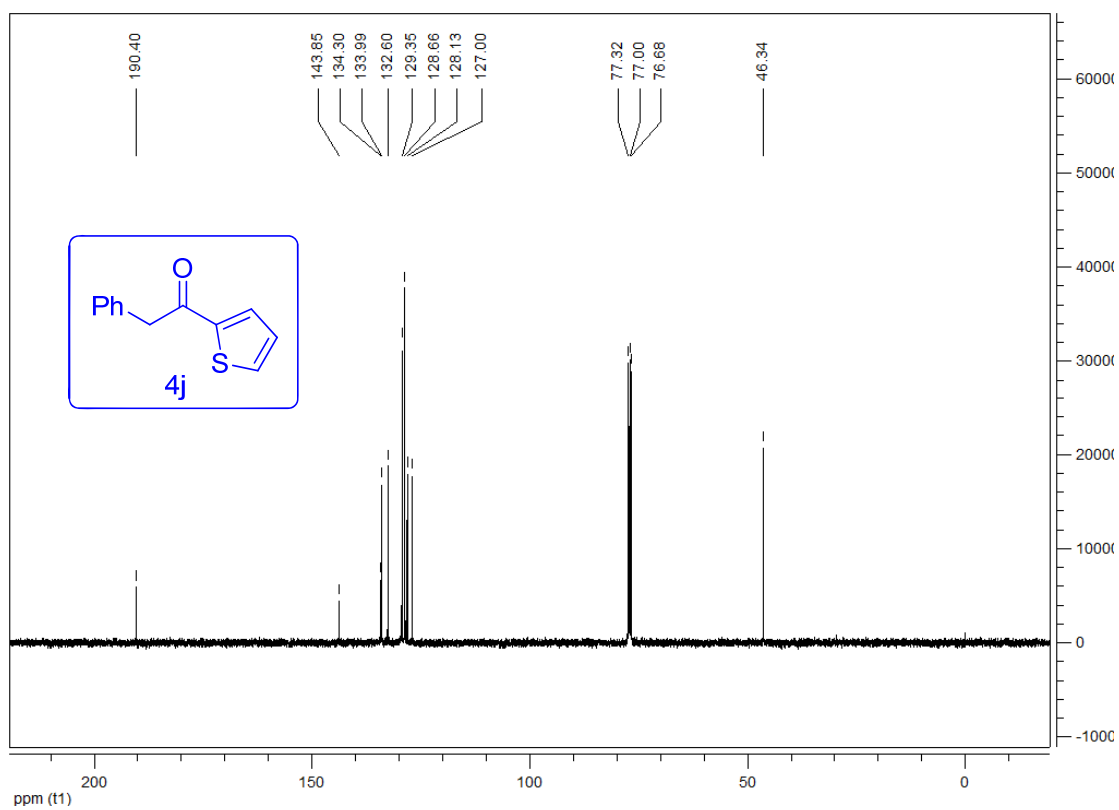

Supplement: c5qo00241a1.pdf [file c5qo00241a1.pdf]
